***Selective axonal translation of prenylated Cdc42 mRNA isoform  
supports axon growth***

Seung Joon Lee<sup>1</sup>, Amar N. Kar<sup>1</sup>, Riki Kawaguchi<sup>2</sup>, Priyanka Patel<sup>1</sup>, Pabitra K. Sahoo<sup>1</sup>, Byron Aguilar<sup>3</sup>,  
Kelsey D. Lantz<sup>1</sup>, Caylee R. McCain<sup>1</sup>, Giovanni Coppola<sup>2,4</sup>, Qun Lu<sup>3</sup>, Jeffery L. Twiss<sup>1</sup>

<sup>1</sup> Department of Biological Sciences, University of South Carolina, Columbia, SC 29208 USA

<sup>2</sup> Department of Psychiatry, Semel Institute for Neuroscience and Human Behavior, Los Angeles, CA  
90095-1761, USA

<sup>3</sup> Department of Anatomy and Cell Biology, Brody School of Medicine, Eastern Carolina University,  
Greenville, NC 27834 USA

<sup>4</sup> Department of Neurology, Semel Institute for Neuroscience and Human Behavior, Los Angeles, CA  
90095-1761, USA

Corresponding Author: Jeffery L. Twiss, M.D., Ph.D.  
Dept. Biological Sciences  
University of South Carolina  
715 Sumter St., CLS 401  
Columbia, SC 29208 USA  
phone, (803)777-9215  
fax, (803)777-4242  
email, [twiss@mailbox.sc.edu](mailto:twiss@mailbox.sc.edu)

Running Title: *Axonal Cdc42 mRNA supports growth*

Figures: 7 Figures, 2 Expanded View Figures, 1 Expanded View Table

Word Count: Abstract - 175 words

## ABSTRACT

The small Rho-family GTPase CDC42 has long been known to have a role in cell motility and axon growth. The eukaryotic *Cdc42* gene is alternatively spliced yielding mRNAs with two different 3'UTRs and distinct C-termini, which have CaaX and CCaX motifs for post-translational prenylation or palmitoylation, respectively. Palmitoylated CDC42 protein has been shown to contribute to dendrite maturation, while the prenylated CDC42 protein contributes to axon specification. Here, we show that the mRNA encoding prenylated CDC42 protein preferentially localizes into axons of cultured sensory neurons. We show that prenylated CDC42 promotes axon growth in cultured sensory neurons, but palmitoylated CDC42 does not affect axon growth. The growth promotion by prenylated CDC42 requires axonal localization of its mRNA and an intact C-terminal CaaX motif for post-translational modification of the encoded protein by prenylation. Prenyated CDC42 protein localizes to the periphery of growth cones, but this subcellular localization requires axonal targeting of its mRNA. Together, these data show that alternative splicing of the *Cdc42* gene product generates an axon growth-promoting, locally synthesized prenylated CDC42 protein.

Keywords: alternative splicing / axon regeneration / growth cone / mRNA transport / post-translational modification

## INTRODUCTION

Concentrating proteins in subcellular regions is used to create unique functional domains in polarized cells. This can be achieved by specifically transporting proteins from their sites of translation to subcellular regions through protein targeting sequences that are used for protein localization (Emanuelsson et al, 2007). Transport of mRNAs to subcellular domains with subsequent localized translation in those domains is also used to spatially regulate protein levels within polarized cells. For some mRNAs, this localized translation imparts unique functions to the cell. For example, localization of *β-actin* mRNA to the migratory front of fibroblasts provides directed cell movement during cell migration (Shestakova et al, 2001). These mechanisms have also been observed to occur in other cellular functions. For example, mRNAs encoding ribosomal proteins were recently shown to relocalize to the apical side of intestinal epithelium when fasted mice are fed (Moor et al, 2017).

As remarkably polarized cells with widely separated and specialized subcellular domains, neurons have provided a very useful model system to both profile the populations of mRNAs that are transported into their axons and dendrites, as well as to test functions of proteins synthesized locally in these compartments (Kar et al, 2018; Terenzio et al, 2017). Axons can extend to lengths that are more than 1000-fold longer than the neuron's cell body diameter, and localized synthesis of new proteins in distal axons provides a level of autonomy to respond to extracellular stimuli (Sahoo et al, 2018). For example, both growth-promoting and growth-inhibiting stimuli regulate intra-axonal protein synthesis to support directional growth of axons and axon branching (Rangaraju et al, 2017; Terenzio et al, 2017). RNA profiling studies have shown hundreds to thousands of mRNAs localized into axons of sensory, cortical, retinal ganglion cell, and motor neurons (see (Kar et al, 2017) for a recent review). These populations include several mRNAs encoding proteins that can modify the axonal cytoskeleton, either directly through generation of microfilament, intermediate filament, and microtubule precursors or

indirectly by generation of proteins that regulate polymerization, depolymerization, severing, or branching of the cytoskeleton.

Previous work from the Jaffrey group has shown the mRNA encoding the small GTPase RHOA, whose activation has been shown to trigger axon retraction, localizes into and is translated within axons in response to the axon repelling stimulus Semaphorin 3a (Wu et al, 2005). RHOA belongs to the Rho GTPase family, that also includes cell division cycle 42 (CDC42) and RAC proteins. Rho GTPases regulate cytoskeleton organization and antagonistic functions among these family members have been reported in neurons (Etienne-Manneville & Hall, 2002). For instance, RHOA activation leads to neurite retraction through an increase in actomyosin contractility and actin depolymerization, while CDC42 and RAC activation lead to neurite extension by promoting actin polymerization (Da Silva et al, 2003; Jalink et al, 1994; Luo, 2000; Luo et al, 1994). Intra-axonal translation of *RhoA* mRNA increases after exposure to Semaphorins and chondroitin sulfate proteoglycans (CSPG) triggering growth cone repulsion and/or collapse. Depleting RHOA from axons prevents this growth cone collapse allowing axons to grow on CSPGs (Walker et al, 2012a; Wu et al, 2005). These observations point to a role for intra-axonal mRNA translation in propagating the effects of growth inhibitory stimuli.

Here, we show that *Cdc42* mRNA, whose protein product generates effects opposite of RhoA (Hall & Lalli, 2010), is also translated in axons. The *Cdc42* gene undergoes alternative splicing to generate two distinct *Cdc42* mRNAs. We find that the mRNA encoding the prenylated CDC42 (*prenyl-Cdc42*; also known as the 'placental isoform'), but not the mRNA encoding the palmitoylated CDC42 isoform (*palm-Cdc42*; also known as the 'brain isoform'), localizes into axons and supports axon growth. The *prenyl-Cdc42* and *palm-Cdc42* mRNAs have distinct C-termini and 3'UTRs (Wirth et al, 2013), and the 3'UTR of the *prenyl-Cdc42* mRNA drives its localization into axons. Both axonal localization of the *prenyl-Cdc42* mRNA and an intact C-terminal CaaX motif for prenylation are needed to fully support axon growth. CDC42's contribution to axonal growth has been known for many years, and our data

indicate that this function is uniquely driven by the prenyl-CDC42 isoform through axonal localization of the *prenyl-Cdc42* mRNA and C-terminal modification of the locally translated protein product.

## RESULTS

***Prenyl-Cdc42 mRNA isoform uniquely localizes into axons*** – The rat *Cdc42* gene consists of 7 exons that generate two mRNA isoforms by alternative splicing of exons six and seven (Fig 1A). The splice variant ending with exon six encodes the *palm-Cdc42* mRNA that generates a palmitoylated protein. The splice variant where exon six is skipped to include exon seven encodes the ubiquitously expressed *prenyl-Cdc42* mRNA that generates a prenylated protein (Wirth et al, 2013). Thus, these two *Cdc42* mRNAs have different 3'UTRs and they encode proteins with distinct C-terminal 11 amino acids. This alternative splicing of the *Cdc42* gene product is conserved from fish to mammals (Table EV1). Mining published RNA sequencing (RNA-seq) data from axonal RNA isolates shows that the *prenyl-Cdc42* mRNA isoform is expressed at higher levels than the *palm-Cdc42* mRNA isoform in cultured embryonic mouse sensory and motor neurons, but an overall higher proportion of the *prenyl-Cdc42* mRNA appeared to localize into axons compared to the *palm-Cdc42* mRNA (Fig EV1A-B) (Briese et al, 2016; Minis et al, 2014). RNA-seq data from adult mouse DRG cultures similarly show higher proportion of the *prenyl-Cdc42* mRNA in axons than the *palm-Cdc42* mRNA (Fig EV1C). In contrast, published RNA-seq data for cortical neurons show near-equivalent proportions of *prenyl-Cdc42* and *palm-Cdc42* mRNAs in neurite preparations that contain both axons and dendrites (Fig EV1D). Together, these data suggest that *Cdc42* mRNA isoforms are present in neuronal processes similar to what has been shown for *RhoA* mRNA (Walker et al, 2012b; Wu et al, 2005), with potentially preferential localization of the *prenyl-Cdc42* mRNA into the axonal compartment.

To determine if the *prenyl-Cdc42* mRNA preferentially localizes into axons, we cultured L4-6 dorsal root ganglia (DRG) neurons from adult rat sensory neurons on a porous membrane to allow for purification of RNA from axons and cell bodies (Zheng et al, 2001). Reverse transcriptase-coupled polymerase chain reaction (RT-PCR) showed that the axonal preparations contained *Actb* but not somatodendritic *Map2* mRNA, cell body-restricted *c-Jun* and *H1f0* mRNAs, or glial *Gfap* mRNA (Fig 1B). Using droplet digital RT-PCR (RT-ddPCR), comparable levels of *palm-* and *prenyl-Cdc42* mRNAs were detected in the DRG cell body RNA preparations (Fig 1C). *Prenyl-Cdc42* mRNA was relatively abundant in the axonal RNA isolates compared to *palm-Cdc42* mRNA where only a few copies were detected (Fig 1C). Fluorescence *in situ* hybridization (FISH) also showed *prenyl-Cdc42* mRNA signal in axons, but the axonal signal for *palm-Cdc42* mRNA was comparable to a scrambled probe control (Fig 1D). Notably, the axonal FISH signals for the *prenyl-Cdc42* mRNA appeared granular (Fig 1D) as has been described for transported neuronal mRNAs (Kar et al, 2018). Quantitation of these FISH signals showed significantly less *palm-Cdc42* mRNA than *palm-Cdc42* mRNA in the axons, with comparable cell body levels of these two mRNAs (Fig 1E-F). Thus, the *prenyl-Cdc42* mRNA localizes into axons of adult rat sensory neurons, while the *palm-Cdc42* mRNA is largely restricted to the soma.

***Prenyl-Cdc42 3'UTR drives axon localization*** – Since axon-localizing motifs are often found in 3'UTRs (Andreassi & Riccio, 2009; Gomes et al, 2014), we asked if the different 3'UTRs of *palm-Cdc42* and *prenyl-Cdc42* mRNAs, encoded by exons 6 and 7, respectively, are responsible for their distinct subcellular localization in the DRG neurons. Myristoylated (MYR) eGFP reporter constructs containing the 3'UTRs of *prenyl-Cdc42* vs. *palm-Cdc42* mRNAs (GFP<sup>MYR</sup>3'*palm-cdc42* and GFP<sup>MYR</sup>3'*prenyl-cdc42*, respectively) were expressed in DRG cultures and FISH for GFP RNA was used to test for axonal localization. In these cDNA expression constructs and those used below, we refer to the 3'UTR as nt 731-1503 for *palm-Cdc42* mRNA (NCBI RefSeq ID, XM\_008764287.2) and nt 1147-2547 for *prenyl-*

SJ Lee *et al.*  
*Selective axonal localization of Cdc42 mRNA isoforms*

*Cdc42* mRNA (NCBI RefSeq ID, XM\_008764286.2), while exons 6 and 7 consist of nt 641-1503 for *palm-Cdc42* mRNA and 1057-2547 for *prenyl-Cdc42* mRNA, respectively (with nt 641-697 in *palm-Cdc42* and nt 1057 to 1113 in *prenyl-Cdc42* encoding the same amino acids). Only the GFP<sup>MYR</sup>3'prenyl-cdc42 transfected neurons showed detectable axonal GFP RNA signals (Fig 2A-C). Axonal FISH signals for GFP<sup>MYR</sup>3'*palm-Cdc42* mRNA were not significantly different than those of the GFP<sup>MYR</sup> mRNA carrying the 3'UTR of *γ-actin* mRNA that has been previously shown not to localize into DRG axons (Willis et al, 2007). Thus, the 3'UTR from CDC42 exon 7 that is only included in the *prenyl-Cdc42* mRNA is sufficient for axonal mRNA localization.

Alternative splicing of the *Cdc42* gene product accounts for the different 3'UTRs of the endogenous *prenyl-* and *palm-Cdc42* mRNAs. The GFP<sup>MYR</sup> constructs used above would not be subjected to these splicing events, and retention of proteins at splice sites or exon junctions has been suggested to impact subcellular localization and/or translation of the endogenous mRNAs (Le Hir et al, 2016). To address this possibility, we generated *Cdc42* 'mini-gene' constructs that include GFP cDNA fused to rat *Cdc42* exons 4, 5 and 6 or exons 4, 5 and 7 (Fig EV2A). Exons 4 and 5 were separated by the endogenous 103 nucleotide (nt) intervening intron; exons 5 and 6 or 5 and 7 were separated by a 500 nt intronic sequence downstream of exon 5 and plus 500 nt intronic upstream of exon 6 or 7. By RT-PCR, DRGs transfected with these mini-gene constructs showed PCR products at the anticipated sizes of the mature RNA for GFP + *Cdc42* exons 4-6 and GFP + *Cdc42* exons 4-5 + 7 (Fig EV2B). By FISH, GFP mRNA in cell bodies showed comparable levels for DRG neurons transfected with either the mini-gene (GFP + *Cdc42* exons 4-6 and GFP + *Cdc42* exons 4-5 and 7) and GFP cDNA + 3'UTRs of *prenyl-Cdc42* and *palm-Cdc42* constructs (Fig EV2C). Robust axonal localization was seen for the mini-gene construct containing *Cdc42* exon 7 and the GFP-3'prenyl-Cdc42 cDNA constructs (Fig EV2D). mRNAs from neither the mini-gene containing CDC42 exon 6 or the GFP-3'palm-Cdc42 showed significant axonal localization above the GFP control construct (Fig EV2D), which we have previously shown does not localize into axons (Merianda et

al, 2013). These data further emphasize that 3'UTR sequences encoded by exon 7 of the *Cdc42* gene are necessary and sufficient for axonal localization, and this explains the more robust axonal localization of *prenyl-Cdc42* compared to *palm-Cdc42* mRNA.

We next asked whether the 3'UTR of *prenyl-Cdc42* supports translation of the mRNA in axons by transfecting DRG neurons with the GFP<sup>MYR</sup>3'prenyl-cdc42 and GFP<sup>MYR</sup>3'palm-cdc42. The MYR tag of the GFP markedly limits diffusion of the protein in neurites so that sites of protein synthesis in dendrites and axons can be visualized using fluorescence recovery after photobleaching (FRAP) (Aakalu et al, 2001; Yoo et al, 2013; Yudin et al, 2008). FRAP studies revealed that distal axons of DRGs expressing GFP<sup>MYR</sup>3'prenyl-cdc42 mRNA showed significantly higher GFP<sup>MYR</sup> recovery after photobleaching than those expressing GFP<sup>MYR</sup>3'palm-cdc42 mRNA (Fig 2D-E). Pre-incubation with the translation inhibitor anisomycin attenuated the post-bleach fluorescent recovery, indicating that the axonal GFP<sup>MYR</sup>3'prenyl-cdc42 fluorescent recovery derives from protein that is locally synthesized in these axons (Fig 2D-E). The GFP<sup>MYR</sup>3'palm-cdc42 did show more recovery than GFP<sup>MYR</sup>3'γ-actin transfected neurons, which is consistent with the low axonal levels of *palm-cdc42* mRNA seen by RT-ddPCR in Fig 1C. Nonetheless, these data show that the different 3'UTRs in *prenyl-Cdc42* vs. *palm-Cdc42* mRNAs are responsible for the preferential axonal localization of *prenyl-Cdc42* mRNA in adult rodent sensory neurons.

***Axonal prenyl-Cdc42 mRNA drives axon growth*** – CDC42 protein has been shown to localize to growth cones and its activation supports neurite outgrowth (Matsuura et al, 2004; Myers et al, 2012). Recent work linked the prenyl-CDC42 protein isoform to axon specification in CNS neurons while the palm-CDC42 protein isoform was needed for dendritic spine development (Yap et al, 2016). To determine whether axonal localization of *prenyl-Cdc42* mRNA contributes to the known growth effects of CDC42 protein, we selectively knocked down prenyl- vs. palm-CDC42 or both using pan and isoform-specific siRNAs (siCdc42, siPrenyl and siPalm; Fig 3A). RT-ddPCR analyses showed that the pan siCdc42 depleted



both *Cdc42* mRNA isoforms (Fig 3B-C) and decreased axon growth in the DRG cultures (Fig 3D-E). The siPalm depleted *palm-Cdc42* mRNA with no effect on *prenyl-Cdc42* mRNA level (Fig 3B-C). siPrenyl depleted *prenyl-Cdc42* mRNA by more than 70%, but the *palm-Cdc42* mRNA was also 40-50% decreased by the siPrenyl transfections (Fig 3B-C). siPrenyl significantly decreased axonal growth, at levels comparable to depletion of both mRNA isoforms using pan siCdc42, but the siPalm had no apparent effect on axon outgrowth (Fig 3D-E)

The comparable effect of siCdc42 and siPrenyl on axon outgrowth would be consistent with the notion that axonally localizing *prenyl-Cdc42* mRNA selectively supports axon growth. However, we could not rule out contributions of the *palm-Cdc42* mRNA isoform to axon growth given that its levels were decreased by both siCdc42 and siPrenyl transfections. Thus, we tested the ability of siRNA-resistant ('si-resistant') *prenyl-Cdc42* and *palm-Cdc42* constructs as GFP fusion proteins to rescue the decrease in axonal growth seen after pan-siCdc42 transfection (Fig 4A). Axon growth was only fully rescued by expressing the si-resistant *prenyl-Cdc42* mRNA with its axonally localizing 3'UTR (Fig 4B-C). There was no rescue when the si-resistant *prenyl-Cdc42* mRNA included the 3'UTR of the GFP construct (Fig 4B-C), which we had previously shown does not localize into DRG axons (Merianda et al, 2015). The si-resistant *palm-Cdc42* mRNA similarly did not rescue the axon growth deficit in the siCdc42-transfected DRGs (Fig 4B-C). Consistent with these results, pharmacological activation of Cdc42 increased axon growth but this effect was lost in DRGs transfected with pan-siCdc42 or siPrenyl but not siPalm (data not shown). Taken together, these data indicate that the axonally localizing *prenyl-Cdc42* mRNA, and not the non-localizing *palm-Cdc42* mRNA, supports axon growth in adult sensory neurons. Notably, branching of axons was not affected by knockdown of CDC42 or rescue transfections with si-resistant prenyl-CDC42 or palm-CDC42 constructs (Fig 4D), indicating that CDC42 contributes to axon elongation and not axon branching.

***Axonal RNA localization and prenylation motif of prenyl-Cdc42 mRNA are needed for optimal axonal outgrowth*** – Although only differing by 11 amino acids, unique functions for prenyl- and palm-CDC42 protein isoforms in neurons have been reported in previous studies (Kang et al, 2008; Yap et al, 2016). We wondered if distinct subcellular localization of *prenyl-Cdc42* and *palm-Cdc42* mRNAs in the DRG neurons contributes to these unique functions and asked if targeting the *palm-Cdc42* mRNA into axons would affect axon growth. For this, we generated si-resistant palm-CDC42 expressing cDNAs with its 3'UTR replaced by the axonal-targeting *prenyl-Cdc42* 3'UTR (Fig 5A). Pan-siCdc42 transfected DRG neurons showed partial rescue of axon growth with expression of the axonally-targeted si-resistant *palm-Cdc42* mRNA (Fig 5B). This observation suggests that either CDC42 isoform can support axon growth, but only the axonally targeted *prenyl-Cdc42* mRNA can fully rescue the axon growth deficit seen with knockdown of both CDC42 isoforms.

With different degrees of rescue by axonally targeted *prenyl-* vs. *palm-Cdc42* mRNAs, we next asked whether the post-translational prenylation or palmitoylation accounts for the growth promoting effects of the axonally targeted *prenyl-Cdc42* mRNA. The first 180 amino acids of palm-Cdc42 and prenyl-Cdc42 proteins are identical, with the distinct C-terminal 11 amino acids encoded by exons 6 and 7, respectively. The four C-terminal residues of these two Cdc42 isoforms contain CCaX and CaaX motifs for palmitoylation and prenylation, respectively (where C represents cysteine, a is an aliphatic amino acid and X is any amino acid) (Wirth et al, 2013). The cysteines in the CaaX and CCaX motifs are covalently modified by prenylation and palmitoylation (Nishimura & Linder, 2013), and mutating the cysteine residues to serine has been used to prevent these post-translational modifications (Wirth et al, 2013). The CCaX motif in the *palm-Cdc42* protein product (CCIF) can undergo an initial prenylation at the first cysteine followed by palmitoylation at the second cysteine (Wirth et al, 2013). Thus, we generated si-resistant mutants for *palm-Cdc42* with its C-terminal CCIF mutated to CSIF, SCIF, and SSIF and for *prenyl-Cdc42* with its C terminal CVLL mutated to SVLL to block post-translational modifications

of these protein (Fig 5A). Both the *prenyl-Cdc42* and *palm-Cdc42* mRNAs were targeted into the axons using the 3'UTR of *prenyl-Cdc42* mRNA. The axonally targeted, si-resistant *palm-Cdc42* SCIF and SSIF mutants did not significantly increase axon growth in the pan-siCdc42 transfected neurons (Fig 5B). Axonally-targeted si-resistant *prenyl-Cdc42* SVLL mRNA and *palm-Cdc42* with intact CCIF motif showed partial rescue of axon growth in pan-siCdc42 transfected DRG cultures as compared to axonally targeted, si-resistant *prenyl-Cdc42* with intact CVLL motif at its C-terminus (Fig 5B). Taken together, these data suggest that both axonal mRNA localization and the post-translational prenylation are needed for the full axon growth-promoting effects of the prenyl-CDC42 isoform, with the palm-CDC42 isoform only partially supporting axon growth when it is targeted into axons. Notably, axon branching did not show any significant change by expression of the either wild type or mutant CDC42 constructs (Fig 5C).

***Prenyl-Cdc42 and Palm-Cdc42 proteins show distinct localizations in growth cones*** – Since axonally targeted *palm-Cdc42* mRNA with intact C-terminal CCIF motif did not promote axon growth to the same extent as *prenyl-Cdc42* mRNA, we asked if prenyl-CDC42 and palm-CDC42 proteins show different localization along axons or within growth cones. We used high resolution confocal microscopy to visualize GFP-tagged prenyl-CDC42 and palm-CDC42 proteins in distal axons and growth cones of DRG neurons transfected with CDC42 constructs with or without axonally localizing 3'UTR encoded by *Cdc42* exon 7 (Fig 6A). The protein product of the axonally targeted *GFP-prenyl-Cdc42* mRNA showed fluorescent signals concentrated at the periphery of the growth cone, frequently with what appeared to be localization just beneath the axoplasmic membrane (Fig 6B-C). In contrast, *GFP-prenyl-Cdc42* mRNA with C-terminal CVLL to SVLL mutation, which prevents prenylation of the protein product, showed lower signals in the growth cone and rare concentrated signals (Fig 6D-E). Removing the axonal-targeting 3'UTR from *GFP-prenyl-Cdc42* mRNA gave protein signals that were similarly low in the growth cone and rarely concentrated at the growth cone periphery (Fig 6F-G); since this mRNA would contain a

3'UTR from the GFP construct, it would be expressed and translated as the GFP signals in axon shaft clearly show. Interestingly, targeting *GFP-palm-Cdc42* mRNA into axons using the *prenyl-Cdc42* 3'UTR showed GFP signals that were quite similar to the prenyl-CDC42 SVLL mutant and cell body-restricted *GFP-prenyl-Cdc42* expressing neurons (Fig 6H-I). Robust GFP signals were observed along the axon shafts for each of these proteins (Fig 6B-I). Thus, we conclude that the distinct localization of GFP-prenyl-CDC42 to the periphery of growth cones is determined by both its axonal translation and intact CaaX motif.

## DISCUSSION

Intra-axonal protein synthesis has been shown to contribute to axon growth during development and regeneration, and thousands of mRNAs are now known to localize into axons *in vitro* (Kar et al, 2018). Though most studies on axonal protein synthesis have used cultured neurons, there is increasing evidence for protein synthesis in axons *in vivo* during development and after injury (Akins et al, 2017; Brittis et al, 2002; Jin et al, 2016; Kalinski et al, 2015; Shigeoka et al, 2016; Walker et al, 2012a; Willis et al, 2011). Our data indicate that the mRNA for the prenylated isoform of CDC42, and not the palmitoylated CDC42 isoform, localizes into axons where its protein product promotes axon growth. With roles in actin polymerization and filopodia formation, CDC42 protein function has long been linked to axon growth and cell migration (Hall & Lalli, 2010). The palm-CDC42 and prenyl-CDC42 isoforms are generated by alternative splicing with differential inclusion of exons 6 and 7 in the mature mRNA isoforms, respectively (Chen et al, 2012). Studies in cultured CNS neurons has pointed to differential roles for the palm-CDC42 and prenyl-CDC42 isoforms in dendrite maturation and axon specification, respectively (Yap et al, 2016). Our data emphasize that axonal mRNA targeting through use of *Cdc42* gene's exon 7 and axonal translation of the resulting mRNA are responsible for CDC42's axon growth promoting functions. Interestingly, many mRNAs that localize into axons are also translated in the soma,

with the soma-derived protein product being transported into axons. Consistent with this, both the prenyl-CDC42 and palm-CDC42 proteins localize into axons when expressed with a cell body-restricted 3'UTR.

Alternative RNA splicing can increase the number of different proteins that can be generated from a single gene. Subcellular localization of mRNAs is most frequently driven by sequence motifs in 3'UTRs (Andreassi & Riccio, 2009; Gomes et al, 2014). Previous studies showed that *Importin  $\beta$ 1*, *RanBP1*, *Stat3 $\alpha$*  and *BDNF* mRNA isoforms with long 3'UTRs can be selectively transported into neuronal processes (An et al, 2008; Ben-Yaakov et al, 2012; Perry et al, 2012; Yudin et al, 2008). Alternative poly-adenylation site usage generates the 'long 3'UTR' variants of those mRNAs such that an RNA localization motif is presumably introduced from the additional 3'UTR sequences. RNA-seq from neurites of neuronally differentiated mouse neuroblastoma (N2A) and catecholaminergic neuronal tumor (CAD) cell lines recently showed a prevalence for distal alternative last exons and additional exon usage over differential poly-adenylation site usage for subcellularly targeted mRNA isoforms (Taliaferro et al, 2016). This prevalence was similarly seen for localizing mRNA isoforms in neurites from cultures of primary cortical neuron as well as axons from embryonic DRG neuron cultures. Moreover, Taliaferro et al. (2016) observed a shift of alternative splicing to favor mRNA isoforms with localizing 3'UTRs during neuronal differentiation of CAD cells (Taliaferro et al, 2016). Although inclusion of CDC42 exon 7 rather than exon 6 selectively generates a *Cdc42* mRNA isoform with axonally localizing 3'UTR, *Cdc42* expression shifts from generating predominantly *prenyl-Cdc42* mRNA to predominantly *palm-Cdc42* mRNA during brain development (Makeyev et al, 2007). Indeed, palm-CDC42 has been referred to as the 'brain Cdc42' isoform while prenyl-CDC42 is referred to as the 'placental Cdc42' isoform (Nicole et al, 1999), suggesting tissue specific functions for these differentially modified Cdc42 isoforms. The RNA-binding protein PTBP1 attenuates alternative splicing in non-neuronal cells by control of 5' splice site usage (Hamid & Makeyev, 2014). PTBP1 was shown to suppress splicing of *Cdc42* exon 6, making *prenyl-Cdc42*

mRNA the dominant splice variant when PTBP1 is expressed, and *palm-Cdc42* mRNA the dominant splice variant when PTBP1 is not expressed (Makeyev *et al.*, 2007). Expression of miR-124 that targets PTBP1 mRNA increases during brain development such that PTBP1 levels fall as the nervous system develops (Hamid & Makeyev, 2014). Interestingly, RNA-seq profiles from cultured embryonic motor and sensory as well as adult sensory neurons show higher levels of *prenyl-Cdc42* than *palm-Cdc42* mRNAs (Briese *et al.*, 2016; Minis *et al.*, 2014) (Figure EV1). In contrast to the maturing brain, these cultured neurons continuously extend axons, so it is possible that continued use of *Cdc42* exon 7 helps to drive axon growth by generating *prenyl-Cdc42* mRNA that localizes into growing axons.

Axonal CDC42 activity is increased by the axon growth-promoting BDNF and laminin and decreased by the chemo-repellant Slit2 (Myers *et al.*, 2012; Wong *et al.*, 2001; Yuan *et al.*, 2003). Neuronal CDC42 has been shown to contribute to axon initiation, axon growth, and growth cone guidance (Hall & Lalli, 2010). For example, selective localization of RAP1b and CDC42 at the tip of the presumptive axon is essential to initiate axon growth and establish polarity of neurons (Schwamborn & Puschel, 2004). Linking CDC42 functions to axon growth has often relied on constitutively active or dominant negative mutations of CDC42 or depletion of both CDC42 isoforms as we have done in Figure 3 (Banzai *et al.*, 2000; Chandran *et al.*, 2016; Nishimura *et al.*, 2005). Overexpression of a single Rho GTPase was shown to competition for with endogenous RhoGTPases for binding to RHOGDI1, and this alter levels of those other RhoGTPases (Boulter *et al.*, 2010). Thus interpretation of studies using overexpression of dominant negative and constitutively active CDC42 mutants is complicated by this competition mechanism. Moreover, the expression constructs for these CDC42 mutants did not contain the axonally localizing 3'UTR encoded by *Cdc42* exon 7 that would be needed to distinguish effects of *palm-CDC42* and *prenyl-CDC42* isoforms as we have used here. CDC42 proteins derived from the cell body-restricted *palm-Cdc42* mRNA and *prenyl-Cdc42* mRNA carrying the cell body-restricted GFP 3'UTR clearly get transported into distal axons. It will be interesting to consider if roles previously ascribed to

CDC42 in axon specification and growth cone guidance are from the axonally translated *prenyl-Cdc42* mRNA. Both BDNF and Slit2 have been shown to regulate protein synthesis in axons (Ming et al, 2002; Piper et al, 2006), so we speculate that CDC42's role in axon guidance could be carried out by intra-axonal translation of *prenyl-Cdc42* mRNA.

Recent work from the Makeyev lab showed differential functions of palm-CDC42 and prenyl-CDC42 for dendrite and axon growth from hippocampal neurons using isoform specific overexpression and knockdown/knockout approaches (Yap et al, 2016). Specifically, their data showed that prenyl-CDC42 is required for development of the axon while palm-CDC42 is needed for maturation of dendritic spines. This implies differential localization of the two proteins, with neuronal polarity determined by the balance of the two. Though in our hands only *prenyl-Cdc42* mRNA localizes into axons, RNA-seq data from cortical neuron cultures shows that both *prenyl-* and *palm-Cdc42* mRNA isoforms are present in neurites (Taliaferro et al, 2016). These preparations contain both axons and dendrites, so it is intriguing to speculate that *palm-Cdc42* mRNA may localize into dendrites considering the relative absence of *palm-Cdc42* mRNA from the axonal compartment. siRNA-based depletion of both CDC42 isoforms from hippocampal neuron cultures at DIV12 decreased dendritic spine numbers and this was rescued by expression of either prenyl-CDC42 or palm-CDC42 (Wirth et al, 2013). It is not clear if 3'UTRs for either the *prenyl-Cdc42* or *palm-Cdc42* mRNAs were included in the expression constructs used by Yap et al. (2016) and Wirth et al. (2013). Nonetheless, rescue of dendritic spine growth by prenyl-CDC42 and palm-CDC42 was lost with CaaX to AaaX mutation of prenyl-Cdc42 and CCaX to AAaX mutation of palm-CDC42 (Wirth et al, 2013), emphasizing the importance for post-translational modification of CDC42's C-terminus. Notably in our hands, both the *palm-Cdc42* and *prenyl-Cdc42* mRNAs localize into dendrites (data not shown), so it is quite feasible that localized synthesis of either CDC42 isoform can contribute to dendritic growth.

Prenylation and palmitoylation modifications of CDC42 proteins increase protein hydrophobicity and facilitate association with cellular membranes. The axonally translated prenyl-CDC42 protein showed increased localization to the periphery of growth cones compared to the more central locations for cell body synthesized prenyl-CDC42, axonally-targeted *prenyl-Cdc42* with mutated CaaX motif, or *palm-Cdc42* targeted into axons with the 3'UTR of *prenyl-Cdc42*. Consistent with the distinct subcellular localization for axonally synthesized prenyl-CDC42, an intact CaaX motif for prenylation of CDC42 is needed for the full growth promoting effects of the axonally targeted *prenyl-Cdc42* mRNA. In contrast, the *palm-Cdc42* mRNA did not support axon growth when targeted into axons to the same extent as the axonally targeted *prenyl-Cdc42* mRNA. Isoprenoid lipid attachments to cysteine residues in the C-terminal CaaX motif of prenyl-CDC42 promotes its subcellular localization to the plasma membrane and other cellular membrane compartments including ER, Golgi, and endosomes (Roberts et al, 2008). Palm-CDC42 and prenyl-CDC42 proteins have been shown to have different mobilities in cell membranes so they may be targeted to different membrane domains. The prenyl-transferases, farnesyl transferase (FT) and geranylgeranyl transferase (GGT), catalyze addition of either farnesyl or geranylgeranyl isoprenoid lipids to cysteine in the CaaX motif. Both prenyl-CDC42 and RHOA, which is also synthesized locally in axons (Wu et al, 2005), are substrates for GGT and not FT (Wirth et al, 2013). On the other hand, both cysteines in the CCaX motif of palm-CDC42 can be palmitoylated or the first cysteine prenylated by GGT followed by palmitoylation of the second cysteine (Nishimura & Linder, 2013; Wirth et al, 2013). It is not clear which of these two modifications of palm-CDC42 occur in the DRG neurons. GGT and FT proteins have been detected in proteomics screens of growth cones from embryonic rat brains (Estrada-Bernal et al, 2012), so at least the terminal proteins needed for prenylation are present in distal axons. Based on previous publications, both CCIF and CSIF motifs would be substrates for GGT (Nishimura & Linder, 2013; Wirth et al, 2013), and hence prenylation of locally synthesized CDC42 likely occurs in the growth cone. Thus, our mutation data suggest that *palm-Cdc42* mRNA targeted into axons through 3'UTR of *prenyl-*



*Cdc42* likely undergoes prenylation as the axonal growth deficit was partially rescued by axonally targeted *palm-Cdc42* mRNA with intact CCIF but not with the SCIF or SSIF mutations. Furthermore, the growth promoting effects of *prenyl-Cdc42* mRNA were lost when the mRNA restricted to the soma by replacing the 3'UTR with that of GFP.

In summary, our data indicate that the prenyl-CDC42 isoform specifically drives CDC42's axon growth promoting effects in adult sensory neurons through axonal translation of its mRNA. This growth promotion also requires an intact CaaX motif for post-translational prenylation of the axonally synthesized CDC42 protein. On first glance, our data seem to contradict a recent study that linked prenylation to slowed axon growth on myelin-associated glycoprotein (MAG), a substrate that inhibits axon growth (Li et al, 2016). In cultured neurons, highly-selective FT inhibitors were more effective than GGT inhibitors for increasing axon growth, but the combination of the two showed synergistic effects (Roberts et al, 2008). RHOA shows altered subcellular localization upon inhibition of GGT (Roberts et al, 2008), and in contrast to the growth promoting effects of prenyl-CDC42 shown here, RHOA attenuates axon growth on non-permissive substrates like MAG and the protein is synthesized in axons (Walker et al, 2012b; Wu et al, 2005). Previous studies have shown compensatory geranylgeranylation through GGT for some farnesylated GTPases when FT is inhibited (Roberts et al, 2008), which could account for the increased efficacy of FT plus GGT inhibition seen by Li et al. (2016). Our analyses of a single prenylated protein points to support of axon growth by this post-translational modification, but only when the protein is locally synthesized in axons. So global inhibition of prenylation may have distinct effects on axon growth from prenylation of locally synthesized proteins in axons.

## **MATERIALS AND METHODS**

***Animal use and neuron cultures*** – All animal experiments were conducted under IACUC approved protocols. For DRG cultures, L4-6 ganglia were isolated from adult male Sprague Dawley rats (175-250 g)

and dissociated with collagenase (Invitrogen). Cells were washed and then plated with DMEM/F12 (Cellgro) supplemented with 10% fetal bovine serum (Gemini Bio), 10  $\mu$ M cytosine arabinoside (Sigma) and N1 supplement (Sigma). Cells were cultured on either glass coverslips or polyethylene-tetrahalate (PET) membrane (1  $\mu$ m pores; Corning) inserts coated with poly-L-lysine (Sigma) and laminin (Millipore).

DRG cultures were transfected with 2-3  $\mu$ g of plasmids using *Amaxa Nucleofection* device (Lonza) with *Basic Neuron SCN Nucleofector* kit (Program SCN-8) before plating and maintained for 48-72 h. For depletion experiments, synthetic siRNAs (predesigned from IDT, 100 nM) were transfected into DRG neurons using *DharmaFECT 3* and incubated for 3 DIV. For control, identical amounts of non-targeting siControl pools were used. RT-ddPCR was used to test the efficiency of depletion (see below). siRNA sequences were: siPrenyl (#1), 5' GUGUUGUCAUCAUACUAAAAGCAAU 3'; siPrenyl (#2), 5' GCAAUGUUUAAAUCAACUAAAGAU 3'; siPalm (#1), 5' GUGAUCAGUAGUCACAUUAGACUUG 3'; siPalm (#2), 5' UCAGUAGUCACAUUAGACUUGUUUA 3'; siCdc42, 5' UGGUAAAACAUGUCUCCUG 3'.

**Plasmid constructs** – All fluorescent reporter constructs for analyses of RNA translation were based on eGFP with myristoylation element (GFP<sup>MYR</sup>; originally provided by Dr. Erin Schuman, Max-Planck Inst., Frankfurt) (Aakalu et al, 2001). To isolate the cDNA of rat *Cdc42* (NCBI RefSeq ID: XM\_008764286 for *prenyl-Cdc42*; XM\_008764287 for *palm-Cdc42*), total RNA from rat DRG was reverse transcribed with *SuperScript II* (Invitrogen) and then amplified by PCR using *PrimeStar HS* polymerase (Takara). Primers for amplifying the *prenyl-Cdc42* coding sequence and 3'UTR were engineered to contain terminal Not I and Sal I restriction sites. Using these restriction sites, the amplicons were then inserted into pEGFP-C3 (Clontech) vectors. *Quikchange site-directed mutagenesis kit* (Stratagene) was used to introduce point mutations of CaaX or CCaX motifs.

**Fluorescence in situ hybridization and immunofluorescence** – Myristoylated EGFP was fused with 3'UTRs of *Cdc42* isoforms to test their axonal localization. Transfected DRG neurons were fixed 15 min in 4% paraformaldehyde (PFA) and hybridized with DIG-labeled GFP cRNA probes (Roche) as described

previously (Merianda et al, 2013). Sheep anti-DIG (1:100; Roche, # 11333089001) was used to detect probes with Cy5-conjugated donkey anti-sheep (1:200; Jackson ImmunoResearch, # 713-095-003). Endogenous Cdc42 isoforms were detected with 5' Cy5-labelled Stellaris probes (probe sequences available upon request; Biosearch Tech).

For immunofluorescence, neurons plated on glass coverslips were fixed with 4% paraformaldehyde in PBS for 15 min at room temperature. Cultures were permeabilized with 0.3% Triton X-100 in PBS for 15 min and incubated with primary antibodies for overnight in humidified chambers at 4°C. Chicken anti-NF (1:1,000; Aves labs, # NFL, NFM and NFH) was used for labelling neurons and FITC-conjugated donkey anti-chicken (1:200; Jackson ImmunoResearch, # 703-095-155) were used as secondary antibodies. For visualization of GFP-tagged Cdc42 proteins in growth cones, rabbit anti-GFP (1:500; Abcam, # ab6556) and chicken anti-NF (1:1,000, Aves labs) was used for primary antibodies and FITC-conjugated donkey anti-rabbit (1:200; Jackson ImmunoResearch, # 711-095-152) and Cy5-conjugated donkey anti-chicken (1:200; Jackson ImmunoResearch, # 703-175-155) were used as secondary antibodies. Coverslips were washed with PBS and then incubated with secondary antibodies for an hour before mounting with Prolong anti-fade mounting solution (Invitrogen).

For analyses of FISH signals, images were obtained using an epifluorescence microscope equipped with ORCA ER CCD camera (Hamamatsu) using matched acquisition parameters (exposure time and gain). Pixel intensities were measured from distal axons from more than 50 neurons in three replicate experiments. GFP signals in the growth cone were detected by Leica SP8X confocal microscope with HyD detectors. Z-stack images were post-processed by Huygens deconvolution (Scientific Volume Imaging) integrated into the Leica LASX software (*HyVolution*). Deconvolved image stacks were projected into single plane images using the maximum pixel intensities.

**RNA isolation and PCR analyses** – RNA was isolated from dissociated DRG neurons or cell body/axon compartments collected from insert cultures using *RNeasy Micro kit* (Qiagen). Purified RNAs were

quantified with *Ribogreen* (Invitrogen) and 10-50 ng of RNA were used for reverse transcription with *SensiFAST cDNA synthesis kit* (Bioline) according to the manufacturer's protocol. To assess the purity of axonal RNA, RT-PCR was performed with primers designed to detect cell body-restricted mRNAs (*c-Jun*, *H1f0*, *Map2*) and glial cell-specific mRNAs (*Gfap*). ddPCR was performed according to manufacturer's procedure (Biorad) with either *Evagreen* (Biorad) or *Taqman* probe assays (Integrated DNA Tech). *Hmgb1* mRNA levels were used for normalizing RNA yields across different isolates; we have previously shown that cell body and axonal RNA levels of *Hmgb1* mRNA do not change after axotomy (Merianda et al, 2015).

**Axon growth analyses** – For analyses of axon growth, dissociated DRGs grown on glass coverslips or glass bottom 24 well plates were immunostained with neurofilament antibodies as described above. Entire coverslip or bottom of the 24 well plates were scanned with ImageXpress Micro system (Molecular Devices) using a 20X objective. Stitched images were assessed for total axon length, longest axon length, and branching using WIS-Neuromath (Weisman Institute (Rishal et al, 2013)) or ImageJ with NeuronJ plugin programs (ImageJ plugin; NIH). All neurons where axonal arbors could be traced by the software were assessed ( $\geq 75$  neurons per group/per experiment).

**Fluorescence Recovery after Photobleaching (FRAP)** – FRAP analyses was performed with minor modifications (Vuppalanchi et al., 2010). DRG neurons were transfected with GFP<sup>MYR</sup>3'prenyl-Cdc42 or GFP<sup>MYR</sup>3'palm-Cdc42 or GFP<sup>MYR</sup>3'γ-actin as a negative control. Cells were maintained at 37°C, 5 % CO<sub>2</sub> during imaging sequences. The 488 nm laser line on Leica SP8X confocal microscope was used to bleach GFP signal (Argon laser at 70% power, pulsed every 0.82 sec for 80 frames). Pinhole was set to 3 Airy units to ensure full thickness bleaching and acquisition (63 X/1.4 NA oil immersion objective) (Yudin et al, 2008). Prior to photobleaching, neurons were imaged every 60 sec for 2 min to acquire baseline fluorescence in the region of interest (ROI; 15 % laser power, 498-530 nm for GFP). The same excitation and emission parameters were used to assess recovery over 15 min post-bleach with images acquired

every 30 secs. To determine if fluorescence recovery in axons due to translation, DRG cultures were treated with 100  $\mu$ m anisomycin (Sigma) for 30 min prior to photobleaching.

Fluorescent intensities in the bleached regions of interest (ROI) were calculated by the Leica LASX software. For normalizing across experiments, fluorescence intensity value at t = 0 min post-bleach from each image sequence was set as 0%. The percentage of fluorescence recovery at each time point after photobleaching was calculated by normalizing relative to the pre-bleach fluorescence intensity for each image sequence was set at 100%.

**Analysis of RNA-Seq data** – Raw FASTQ files of GSE51572, GSE66230, and GSE67828 were downloaded from NCBI GEO database and adaptor sequences were trimmed as necessary (Briese et al, 2016; Minis et al, 2014; Taliaferro et al, 2016). Unpublished axonal RNA-seq data from adult C57Bl/6 mouse DRGs were similarly analyzed using a standard analysis pipeline (<https://github.com/icnn/RNAseq-PIPELINE.git>). Briefly, reads were then aligned to mm10 genome using STAR with default parameters. Mapped reads for mRNAs were counted by HTSeq and then normalized by trimmed mean of M values using EdgeR. Normalized counts were used to quantify levels of *Cdc42* splice variants in axons, neurites or cell bodies.

**Statistical analyses** – All experiments were performed in triplicate and each experiment was repeated at least 3 separate times and are reported as mean  $\pm$  standard deviation (SD) or standard error of the mean (SEM) as indicated in the figure legends. Student's t-test or one-way ANOVA with pairwise comparisons and Tukey post-hoc was used to determine significance differences between groups. GraphPad Prism 5 software was used for all statistical analyses.

**ACKNOWLEDGEMENTS:** This work was supported by grants from NIH (R01-NS041596 and R01-NS089633 to JLT; P30-NS062691 to GC; and, R15-CA165202 to QL), the Dr. Miriam and Sheldon G. Adelson Medical Research Foundation (to JLT and GC), the Harriet and John Wooten Foundation for Alzheimer's Disease Research (to QL), and ASPIRE award from the University of South Carolina Office of

SJ Lee *et al.*  
*Selective axonal localization of Cdc42 mRNA isoforms*

Research (to SJL). JLT is the incumbent SmartState Chair in Childhood Neurotherapeutics at the University of South Carolina.

**AUTHOR CONTRIBUTIONS:** SJL, ANK, and JLT designed the study; SJL, ANK, RK, PP, PKS, KDL and CRM performed the experiments and analyzed the results. RK and GC provided supervision. QL provided critical reagents and advice. SJL and JLT wrote the article with inputs from ANK, QL, RK and GC.

**CONFLICT OF INTEREST:** The authors declare that they have no conflict of interest.

## REFERENCES

- Aakalu G, Smith WB, Nguyen N, Jiang C, Schuman EM (2001) Dynamic visualization of local protein synthesis in hippocampal neurons. *Neuron* **30**: 489-502.
- Akins MR, Berk-Rauch HE, Kwan KY, Mitchell ME, Shepard KA, Korsak LI, Stackpole EE, Warner-Schmidt JL, Sestan N, Cameron HA, Fallon JR (2017) Axonal ribosomes and mRNAs associate with fragile X granules in adult rodent and human brains. *Hum Mol Genet* **26**: 192-209
- An JJ, Gharami K, Liao GY, Woo NH, Lau AG, Vanevski F, Torre ER, Jones KR, Feng Y, Lu B, Xu B (2008) Distinct role of long 3' UTR BDNF mRNA in spine morphology and synaptic plasticity in hippocampal neurons. *Cell* **134**: 175-187
- Andreassi C, Riccio A (2009) To localize or not to localize: mRNA fate is in 3'UTR ends. *Trends Cell Biol* **19**: 465-474
- Banzai Y, Miki H, Yamaguchi H, Takenawa T (2000) Essential role of neural Wiskott-Aldrich syndrome protein in neurite extension in PC12 cells and rat hippocampal primary culture cells. *J Biol Chem* **275**: 11987-11992
- Ben-Yaakov K, Dagan S, Segal-Ruder Y, Shalem O, Vuppalanchi D, Willis DE, Yudin D, Rishal I, Blesch A, Pilpel Y, Twiss JL, Fainzilber M (2012) Axonal Transcription Factors Signal Retrogradely In Lesioned Peripheral Nerve. *EMBO J* **31**: 1350-1363
- Boulter E, Garcia-Mata R, Guilluy C, Dubash A, Rossi G, Brennwald PJ, Burridge K (2010) Regulation of Rho GTPase crosstalk, degradation and activity by RhoGDI1. *Nat Cell Biol* **12**: 477-483
- Briese M, Saal L, Appenzeller S, Moradi M, Baluapuri A, Sendtner M (2016) Whole transcriptome profiling reveals the RNA content of motor axons. *Nucleic Acids Res* **44**: e33
- Brittis PA, Lu Q, Flanagan JG (2002) Axonal protein synthesis provides a mechanism for localized regulation at an intermediate target. *Cell* **110**: 223-235
- Chandran V, Coppola G, Nawabi H, Omura T, Versano R, Huebner EA, Zhang A, Costigan M, Yekkirala A, Barrett L, Blesch A, Michaelievski I, Davis-Turak J, Gao F, Langfelder P, Horvath S, He Z, Benowitz L, Fainzilber M, Tuszynski M, Woolf CJ, Geschwind DH (2016) A Systems-Level Analysis of the Peripheral Nerve Intrinsic Axonal Growth Program. *Neuron* **89**: 956-970
- Chen C, Wirth A, Ponimaskin E (2012) Cdc42: an important regulator of neuronal morphology. *Int J Biochem Cell Biol* **44**: 447-451
- Da Silva JS, Medina M, Zuliani C, Di Nardo A, Witke W, Dotti CG (2003) RhoA/ROCK regulation of neuritogenesis via profilin IIa-mediated control of actin stability. *J Cell Biol* **162**: 1267-1279
- Emanuelsson O, Brunak S, von Heijne G, Nielsen H (2007) Locating proteins in the cell using TargetP, SignalP and related tools. *Nat Protoc* **2**: 953-971
- Estrada-Bernal A, Sanford SD, Sosa LJ, Simon GC, Hansen KC, Pfenninger KH (2012) Functional complexity of the axonal growth cone: a proteomic analysis. *PLoS One* **7**: e31858
- Etienne-Manneville S, Hall A (2002) Rho GTPases in cell biology. *Nature* **420**: 629-635
- Gomes C, Merianda TT, Lee SJ, Yoo S, Twiss JL (2014) Molecular determinants of the axonal mRNA transcriptome. *Dev Neurobiol* **74**: 218-232

- Hall A, Lalli G (2010) Rho and Ras GTPases in axon growth, guidance, and branching. *Cold Spring Harb Perspect Biol* **2**: a001818
- Hamid FM, Makeyev EV (2014) Regulation of mRNA abundance by polypyrimidine tract-binding protein-controlled alternate 5' splice site choice. *PLoS Genet* **10**: e1004771
- Jalink K, van Corven EJ, Hengeveld T, Morii N, Narumiya S, Moolenaar WH (1994) Inhibition of lysophosphatidate- and thrombin-induced neurite retraction and neuronal cell rounding by ADP ribosylation of the small GTP-binding protein Rho. *J Cell Biol* **126**: 801-810
- Jin LQ, Pennise CR, Rodemer W, Jahn KS, Selzer ME (2016) Protein synthetic machinery and mRNA in regenerating tips of spinal cord axons in lamprey. *J Comp Neurol* **524**: 3614-3640
- Kalinski AL, Sachdeva R, Gomes C, Lee SJ, Shah Z, Houle JD, Twiss JL (2015) mRNAs and Protein Synthetic Machinery Localize into Regenerating Spinal Cord Axons When They Are Provided a Substrate That Supports Growth. *J Neurosci* **35**: 10357-10370
- Kang R, Wan J, Arstikaitis P, Takahashi H, Huang K, Bailey AO, Thompson JX, Roth AF, Drisdell RC, Mastro R, Green WN, Yates JR, 3rd, Davis NG, El-Husseini A (2008) Neural palmitoyl-proteomics reveals dynamic synaptic palmitoylation. *Nature* **456**: 904-909
- Kar AN, Lee S, Twiss J (2018) Expanding Axonal Transcriptome Brings New Functions for Axonally Synthesized Proteins in Health and Disease. *The Neuroscientist* **24**: 111-129
- Le Hir H, Sauliere J, Wang Z (2016) The exon junction complex as a node of post-transcriptional networks. *Nat Rev Mol Cell Biol* **17**: 41-54
- Li H, Kuwajima T, Oakley D, Nikulina E, Hou J, Yang WS, Lowry ER, Lamas NJ, Amoroso MW, Croft GF, Hosur R, Wichterle H, Sefti S, Filbin MT, Stockwell B, Henderson CE (2016) Protein Prenylation Constitutes an Endogenous Brake on Axonal Growth. *Cell Reports* **16**: 545-558
- Luo L (2000) Rho GTPases in neuronal morphogenesis. *Nat Rev Neurosci* **1**: 173-180
- Luo L, Liao YJ, Jan LY, Jan YN (1994) Distinct morphogenetic functions of similar small GTPases: *Drosophila* Drac1 is involved in axonal outgrowth and myoblast fusion. *Genes Dev* **8**: 1787-1802
- Makeyev EV, Zhang J, Carrasco MA, Maniatis T (2007) The MicroRNA miR-124 promotes neuronal differentiation by triggering brain-specific alternative pre-mRNA splicing. *Mol Cell* **27**: 435-448
- Matsuura R, Tanaka H, Go MJ (2004) Distinct functions of Rac1 and Cdc42 during axon guidance and growth cone morphogenesis in *Drosophila*. *Eur J Neurosci* **19**: 21-31
- Merianda TT, Coleman J, Kim HH, Kumar Sahoo P, Gomes C, Brito-Vargas P, Rauvala H, Blesch A, Yoo S, Twiss JL (2015) Axonal amphoterin mRNA is regulated by translational control and enhances axon outgrowth. *J Neurosci* **35**: 5693-5706
- Merianda TT, Gomes C, Yoo S, Vuppalachchi D, Twiss JL (2013) Axonal localization of neuritin/CPG15 mRNA in neuronal populations through distinct 5' and 3' UTR elements. *J Neurosci* **33**: 13735-13742
- Ming GL, Wong ST, Henley J, Yuan XB, Song HJ, Spitzer NC, Poo MM (2002) Adaptation in the chemotactic guidance of nerve growth cones. *Nature* **417**: 411-418
- Minis A, Dahary D, Manor O, Leshkowitz D, Pilpel Y, Yaron A (2014) Subcellular transcriptomics-dissection of the mRNA composition in the axonal compartment of sensory neurons. *Dev Neurobiol* **74**: 365-381



- Moor AE, Golan M, Massasa EE, Lemze D, Weizman T, Shenhav R, Baydatch S, Mizrahi O, Winkler R, Golani O, Stern-Ginossar N, Itzkovitz S (2017) Global mRNA polarization regulates translation efficiency in the intestinal epithelium. *Science* **357**: 1299-1303
- Myers JP, Robles E, Ducharme-Smith A, Gomez TM (2012) Focal adhesion kinase modulates Cdc42 activity downstream of positive and negative axon guidance cues. *J Cell Sci* **125**: 2918-2929
- Nicole S, White PS, Topaloglu H, Beigthon P, Salih M, Hentati F, Fontaine B (1999) The human CDC42 gene: genomic organization, evidence for the existence of a putative pseudogene and exclusion as a SJS1 candidate gene. *Hum Genet* **105**: 98-103
- Nishimura A, Linder ME (2013) Identification of a novel prenyl and palmitoyl modification at the CaaX motif of Cdc42 that regulates RhoGDI binding. *Mol Cell Biol* **33**: 1417-1429
- Nishimura T, Yamaguchi T, Kato K, Yoshizawa M, Nabeshima Y, Ohno S, Hoshino M, Kaibuchi K (2005) PAR-6-PAR-3 mediates Cdc42-induced Rac activation through the Rac GEFs STEF/Tiam1. *Nat Cell Biol* **7**: 270-277
- Perry RB, Doron-Mandel E, Iavnilovitch E, Rishal I, Dagan SY, Tsoory M, Coppola G, McDonald MK, Gomes C, Geschwind DH, Twiss JL, Yaron A, Fainzilber M (2012) Subcellular knockout of importin beta1 perturbs axonal retrograde signaling. *Neuron* **75**: 294-305
- Piper M, Anderson R, Dwivedy A, Weinl C, van Horck F, Leung KM, Cogill E, Holt C (2006) Signaling mechanisms underlying Slit2-induced collapse of *Xenopus* retinal growth cones. *Neuron* **49**: 215-228
- Rangaraju V, Tom Dieck S, Schuman EM (2017) Local translation in neuronal compartments: how local is local? *EMBO Reports* **18**: 693-711
- Rishal I, Golani O, Rajman M, Costa B, Ben-Yaakov K, Schoenmann Z, Yaron A, Basri R, Fainzilber M, Galun M (2013) WIS-NeuroMath enables versatile high throughput analyses of neuronal processes. *Dev Neurobiol* **73**: 247-256
- Roberts PJ, Mitin N, Keller PJ, Chenette EJ, Madigan JP, Currin RO, Cox AD, Wilson O, Kirschmeier P, Der CJ (2008) Rho Family GTPase modification and dependence on CAAX motif-signaled posttranslational modification. *J Biol Chem* **283**: 25150-25163
- Sahoo PK, Smith DS, Perrone-Bizzozero N, Twiss JL (2018) Axonal mRNA transport and translation at a glance. *J Cell Sci* **131 pii**: jcs196808
- Schwamborn JC, Puschel AW (2004) The sequential activity of the GTPases Rap1B and Cdc42 determines neuronal polarity. *Nat Neurosci* **7**: 923-929
- Shestakova EA, Singer RH, Condeelis J (2001) The physiological significance of beta -actin mRNA localization in determining cell polarity and directional motility. *Proc Natl Acad Sci USA* **98**: 7045-7050
- Shigeoka T, Jung H, Jung J, Turner-Bridger B, Ohk J, Lin JQ, Amieux PS, Holt CE (2016) Dynamic Axonal Translation in Developing and Mature Visual Circuits. *Cell* **166**: 181-192
- Taliaferro JM, Vidaki M, Oliveira R, Olson S, Zhan L, Saxena T, Wang ET, Graveley BR, Gertler FB, Swanson MS, Burge CB (2016) Distal Alternative Last Exons Localize mRNAs to Neural Projections. *Mol Cell* **61**: 821-833
- Terenzio M, Schiavo G, Fainzilber M (2017) Compartmentalized Signaling in Neurons: From Cell Biology to Neuroscience. *Neuron* **96**: 667-679

- Walker BA, Hengst U, Kim HJ, Jeon NL, Schmidt EF, Heintz N, Milner TA, Jaffrey SR (2012a) Reprogramming axonal behavior by axon-specific viral transduction. *Gene Ther* **19**: 947-955
- Walker BA, Ji SJ, Jaffrey SR (2012b) Intra-axonal translation of RhoA promotes axon growth inhibition by CSPG. *J Neurosci* **32**: 14442-14447
- Willis DE, van Niekerk EA, Sasaki Y, Mesngon M, Merianda TT, Williams GG, Kendall M, Smith DS, Bassell GJ, Twiss JL (2007) Extracellular stimuli specifically regulate localized levels of individual neuronal mRNAs. *J Cell Biol* **178**: 965-980
- Willis DE, Xu M, Donnelly CJ, Tep C, Kendall M, Erenstheyn M, English AW, Schanen NC, Kirn-Safran CB, Yoon SO, Bassell GJ, Twiss JL (2011) Axonal Localization of transgene mRNA in mature PNS and CNS neurons. *J Neurosci* **31**: 14481-14487
- Wirth A, Chen-Wacker C, Wu YW, Gorinski N, Filippov MA, Pandey G, Ponimaskin E (2013) Dual lipidation of the brain-specific Cdc42 isoform regulates its functional properties. *Biochem J* **456**: 311-322
- Wong K, Ren XR, Huang YZ, Xie Y, Liu G, Saito H, Tang H, Wen L, Brady-Kalnay SM, Mei L, Wu JY, Xiong WC, Rao Y (2001) Signal transduction in neuronal migration: roles of GTPase activating proteins and the small GTPase Cdc42 in the Slit-Robo pathway. *Cell* **107**: 209-221
- Wu KY, Hengst U, Cox LJ, Macosko EZ, Jeromin A, Urquhart ER, Jaffrey SR (2005) Local translation of RhoA regulates growth cone collapse. *Nature* **436**: 1020-1024
- Yap K, Xiao Y, Friedman BA, Je HS, Makeyev EV (2016) Polarizing the Neuron through Sustained Co-expression of Alternatively Spliced Isoforms. *Cell Rep* **15**: 1316-1328
- Yoo S, Kim HH, Kim P, Donnelly CJ, Kalinski AL, Vuppalanchi D, Park M, Lee SJ, Merianda TT, Perrone-Bizzozero NI, Twiss JL (2013) A HuD-ZBP1 ribonucleoprotein complex localizes GAP-43 mRNA into axons through its 3' untranslated region AU-rich regulatory element. *J Neurochem* **126**: 792-804
- Yuan XB, Jin M, Xu X, Song YQ, Wu CP, Poo MM, Duan S (2003) Signalling and crosstalk of Rho GTPases in mediating axon guidance. *Nat Cell Biol* **5**: 38-45
- Yudin D, Hanz S, Yoo S, Iavnilovitch E, Willis D, Gradus T, Vuppalanchi D, Segal-Ruder Y, Ben-Yaakov K, Hieda M, Yoneda Y, Twiss JL, Fainzilber M (2008) Localized regulation of axonal RanGTPase controls retrograde injury signaling in peripheral nerve. *Neuron* **59**: 241-252
- Zheng JQ, Kelly TK, Chang B, Ryazantsev S, Rajasekaran AK, Martin KC, Twiss JL (2001) A functional role for intra-axonal protein synthesis during axonal regeneration from adult sensory neurons. *J Neurosci* **21**: 9291-9303

## FIGURE LEGENDS

### **Figure 1: Alternatively spliced *Cdc42* isoform mRNAs differentially localize to axons of sensory**

#### **neurons.**

**A**, Schematic for alternative splicing for *Cdc42* gene products. The two *Cdc42* mRNAs have distinct 3'UTRs from alternative use of exons 6 or 7. These two mRNAs encode proteins with different C-termini.

The protein coding portions of *Cdc42* exons 6 and 7 are shown in darkly shaded green and orange, respectively; the 3'UTR encoding portions of exons 6 and 7 are shown in lightly shaded green and orange, respectively.

**B**, Representative ethidium bromide stained agarose gel of RT-PCR for RNA isolated from axonal and cell body compartments of dissociated DRG neurons is shown.

**C**, RT-ddPCR for *prenyl-Cdc42* and *palm-Cdc42* mRNAs is shown as mean copy number  $\pm$  SEM; *Hmgb1* was used for input RNA normalization (N = 3 biological replicates).

**D**, Representative images of DRG neuron cultures for CDC42 isoform mRNA FISH, neurofilament (NF) immunofluorescence, and corresponding DIC are shown [Scale bars = 10  $\mu$ m].

**E-F**, Quantification of FISH signal intensities are shown as mean pixel intensity  $\pm$  SEM (n  $\geq$  60 neurons from 3 independent transfections; \*\* P < 0.01 by one-way ANOVA with pair-wise comparison and Tukey post-hoc tests).

### **Figure 2: *prenyl-Cdc42* mRNA isoform 3'UTR drives axonal mRNA localization and translation.**

**A**, Representative FISH/IF for *GFP* mRNA and NF protein in DRG neurons transfected with GFP<sup>MYR</sup> reporter containing 3'UTRs of *prenyl-Cdc42* or *palm-Cdc42* mRNAs (GFP<sup>MYR</sup>-3'prenyl-cdc42 and GFP<sup>MYR</sup>-3'palm-cdc42, respectively) are shown [Scale bars = 10  $\mu$ m].

**B-C**, Quantifications of GFP mRNA signals from FISH for cell bodies (**B**) and axons (**C**) are shown as mean pixel intensity  $\pm$  SEM. GFP<sup>MYR</sup>3'γ-actin was used as a negative control (N  $\geq$  45 neurons in 3 transfections; \*\*\*  $p \leq 0.001$  by one-way ANOVA with pair-wise comparison and Tukey post-hoc).

**D-E**, FRAP analyses for distal axons of DRG neurons expressing indicated GFP<sup>MYR</sup> reporter constructs as in A are shown as mean % normalized average recovery  $\pm$  SEM (pre-bleach = 100% and post-bleach = 0 %). The GFP<sup>MYR</sup>3'prenyl-Cdc42 shows significantly greater recovery of fluorescence in axons than GFP<sup>MYR</sup>3'palm-Cdc42 and GFP<sup>MYR</sup>3'γ-actin. Note that translation inhibition prior to photobleaching shows that post-bleach signals of GFP<sup>MYR</sup>3'prenyl-Cdc42 requires protein synthesis (N  $\geq$  15 neurons tested over 3 culture preparations; \*\*\*\*  $P < 0.001$  by two-way ANOVA with pair-wise comparison and Tukey post-hoc tests).

**Figure 3: prenyl-Cdc42 isoform depletion decreases axon growth.**

**A**, Locations of siRNAs targeting both *Cdc42* mRNAs, *prenyl-Cdc42* mRNA, and *palm-Cdc42* mRNA are shown. Two closely spaced siRNAs were designed to target *prenyl-Cdc42* and *palm-Cdc42* mRNAs (designated as '1' and '2' in panels B-C and E).

**B-C**, *Cdc42* mRNA levels were assessed by RT-ddPCR using primers selective for the *prenyl-Cdc42* (**B**) and *palm-Cdc42* (**C**) mRNA. Relative mRNA levels were calculated after normalization with *Hmgb1* mRNA and are shown as mean fold-change relative to control siRNA (siCon)  $\pm$  SEM (N = 3; \*  $P < 0.05$ , \*\*  $P < 0.01$  and \*\*\*  $P < 0.005$  by one-way ANOVA with pair-wise comparison and Tukey post-hoc tests).

**D**, Representative images of NF for rat DRG neurons transfected with siRNAs from A at 48 h post-transfection [Scale bar = 100  $\mu$ m].

**E**, Mean total axon length/neuron  $\pm$  SEM is shown for neurons transfected with siRNAs as in A (N  $\geq$  90 neurons tested over 3 culture preparations; \*  $P < 0.05$  and \*\*  $P < 0.005$  by one-way ANOVA with pair-wise comparison and Tukey post-hoc tests.)

**Figure 4: Axonal prenyl-Cdc42 mRNA rescues axon growth reduction by siRNA.**

**A**, Schematic of the cDNAs expressed for siRNA resistant rescue experiments shown in panel B-D is shown.

**B**, Representative NF immunofluorescent images of rat DRG neurons transfected with control or pan-Cdc42 siRNAs plus si-resistant expression constructs from A at 96 hrs post-transfection [Scale bar = 20  $\mu\text{m}$ ].

**C**, Axon length/neuron for DRG neurons transfected as in A-B is shown as mean fold-change  $\pm$  SEM relative to siCon + GFP transfection (N  $\geq$  150 neurons over 3 replicates; \*\*\* P < 0.005 by one-way ANOVA with pair-wise comparison and Tukey post-hoc tests).

**D**, Axon branching for DRG neurons transfected as in A-B is shown by mean branch points/ $\mu\text{m}$   $\pm$  SEM (N  $\geq$  150 neurons over 3 replicates; no significant changes by one-way ANOVA with pair-wise comparison and Tukey post-hoc tests).

**Figure 5: C-terminal CaaX motif is needed for optimal axon growth by axonal prenyl-Cdc42 mRNA.**

**A**, Schematic for si-resistant *Cdc42* mRNA splice variants with mutations in CaaX and CCaX motifs is shown.

**B**, Axon length/neuron for DRG neurons transfected with control vs. pan-Cdc42 siRNAs plus the indicated mutant CDC42 isoforms is shown. Note that all mutants were targeted into axons using the 3'UTR from *prenyl-Cdc42* mRNA. Values are shown as fold change relative to siCon + eGFP and error bars represent SEM (N  $\geq$  120 neurons over 3 transfections; \* P < 0.05 and \*\*\* P < 0.005 by one-way ANOVA with pair-wise comparison and Tukey post-hoc).

**C**, Axon branching for DRG neurons transfected with pan-Cdc42 siRNAs as in B is shown as mean branch points/ $\mu\text{m}$  axon length  $\pm$  SEM (N  $\geq$  120 neurons over 3 replicate transfections; \* P < 0.05 and \*\*\* P < 0.005 by one-way ANOVA with pair-wise comparison and Tukey post-hoc).

SJ Lee *et al.*  
*Selective axonal localization of Cdc42 mRNA isoforms*

**Figure 6: Axonal mRNA localization and prenylation is required for Cdc42 protein accumulation at the periphery of growth cone**

**A**, Schematic of GFP-CDC42 expression constructs with mutated C-termini and indicated cell body-restricted (*GFP*) or axonally-localizing (*prenyl-Cdc42*) 3'UTRs.

**B-I**, Representative images for distal axon and growth cones are shown as maximum XYZ projection from deconvolved optical Z planes. GFP is shown in the upper row as the indicated spectral intensity images (B, D, F, and H) and NF is shown in red in the lower row (C, E, G, and I) [Scale bar = 10  $\mu$ m].

## EXPANDED VIEW FIGURE LEGENDS

### **Figure EV1: Normalized counts of prenyl-Cdc42 and palm-Cdc42 mRNAs from subcellular transcriptome datasets of different neuron types**

Raw data of published and unpublished subcellular RNA-seq datasets were analyzed to obtain normalized counts. Mean values  $\pm$  SEM of normalized counts for *prenyl-Cdc42* and *palm-Cdc42* mRNAs from biological replicates are plotted. Datasets were from cell body and axon-enriched transcriptomes of: **A**, embryonic DRG neurons (Minis et al, 2014); **B**, embryonic motor neurons (Briese et al, 2016); **C**, adult DRG neurons (unpublished data); and **D**, cell body-/neurite-enriched transcriptome of embryonic cortical neurons (Taliaferro et al, 2016).

### **Figure EV2: Axonal localization of prenyl-Cdc42 does not require splicing**

**A**, Schematics of GFP-Cdc42 constructs designed to mimic pre-mRNA splicing differences between *prenyl-Cdc42* and *palm-Cdc42* mRNAs ('mini-genes') or mature mRNA ('cDNA'). **B**, Representative ethidium-stained agarose gel for RT-PCR to detect splice variants using primers outlined in A is shown. The two lanes of for the Cdc42 mini-genes show replicate transfections. Amplification with primers 1 + 2 shows relatively equivalent expression across the transfections. Amplification with primers 3 + 4 and 3 + 5 shows anticipated splice variants for mini-gene constructs. Control is untransfected DRGs. **C-D**, Quantification of GFP mRNA signals from FISH for cell bodies (**C**) and axons (**D**). GFP was used as a negative control. Error bars represent SEM (N  $\geq$  30 neurons from 3 biological replicates; \*\*\* p < 0.001, \* p < 0.05 by one-way ANOVA with pair-wise comparison and Tukey post-hoc).

**Table EV1: Alternatively spliced variants of Cdc42 are found from fishes to mammals**

Sequence comparison along the phylogenetic tree revealed conservation of Cdc42 alternative splicing from fishes to primates. Notice the last four amino acids of the C-termini of each protein products.

| Species (common name)                         | NCBI Accession #<br><i>prenyl-Cdc42</i> | NCBI Accession #<br><i>palm-Cdc42</i> | CaaX motif<br>prenyl-<br>Cdc42 | CCaX motif<br>palm-Cdc42 |
|-----------------------------------------------|-----------------------------------------|---------------------------------------|--------------------------------|--------------------------|
| <i>Saccharomyces cerevisiae</i> (yeast)       | NM_001182116.1                          | -                                     | CAIL                           | -                        |
| <i>Caenorhabditis elegans</i> (worm)          | NM_063197.7                             | -                                     | CNIL                           | -                        |
| <i>Saccoglossus kowalevskii</i> (worm)        | NM_001168041.1                          | -                                     | CVLL                           | -                        |
| <i>Acanthaster planci</i> (star fish)         | XM_022244898.1                          | -                                     | CSLL                           | -                        |
| <i>Danio rerio</i> (zebra fish)               | NM_200632.2                             | NM_001018120.2                        | CVLL                           | CCIF                     |
| <i>Xenopus tropicalis</i> (frog)              | NM_001017070.3                          | NM_001008026.1                        | CRLI                           | CCIF                     |
| <i>Xenopus laevis</i> (frog)                  | NM_001085899.1                          | XM_018224258.1                        | CMLL                           | CCIF                     |
| <i>Nanorana parkeri</i> (frog)                | XM_018568983.1                          | XM_018568984.1                        | CRLI                           | CCIF                     |
| <i>Callorhynchus milii</i> (shark)            | XM_007897764.1                          | XM_007897763.1                        | CVLL                           | CCIF                     |
| <i>Python bivittatus</i> (snake)              | XM_015889191.1                          | XM_015889192.1                        | CVLL                           | CCIF                     |
| <i>Alligator mississippiensis</i> (alligator) | XM_014597185.2                          | XM_014597186.2                        | CVLL                           | CCIF                     |
| <i>Gallus gallus</i> (chicken)                | NM_205048.1                             | XM_015296827.1                        | CVLL                           | CCIF                     |
| <i>Chelonia mydas</i> (turtle)                | XM_007065922.1                          | XM_007065923.1                        | CVLL                           | CCIF                     |
| <i>Mus musculus</i> (mouse)                   | NM_009861.3                             | NM_001243769.1                        | CVLL                           | CCIF                     |
| <i>Homo sapiens</i> (human)                   | NM_001039802.1                          | NM_044472.2                           | CVLL                           | CCIF                     |



Figure 1

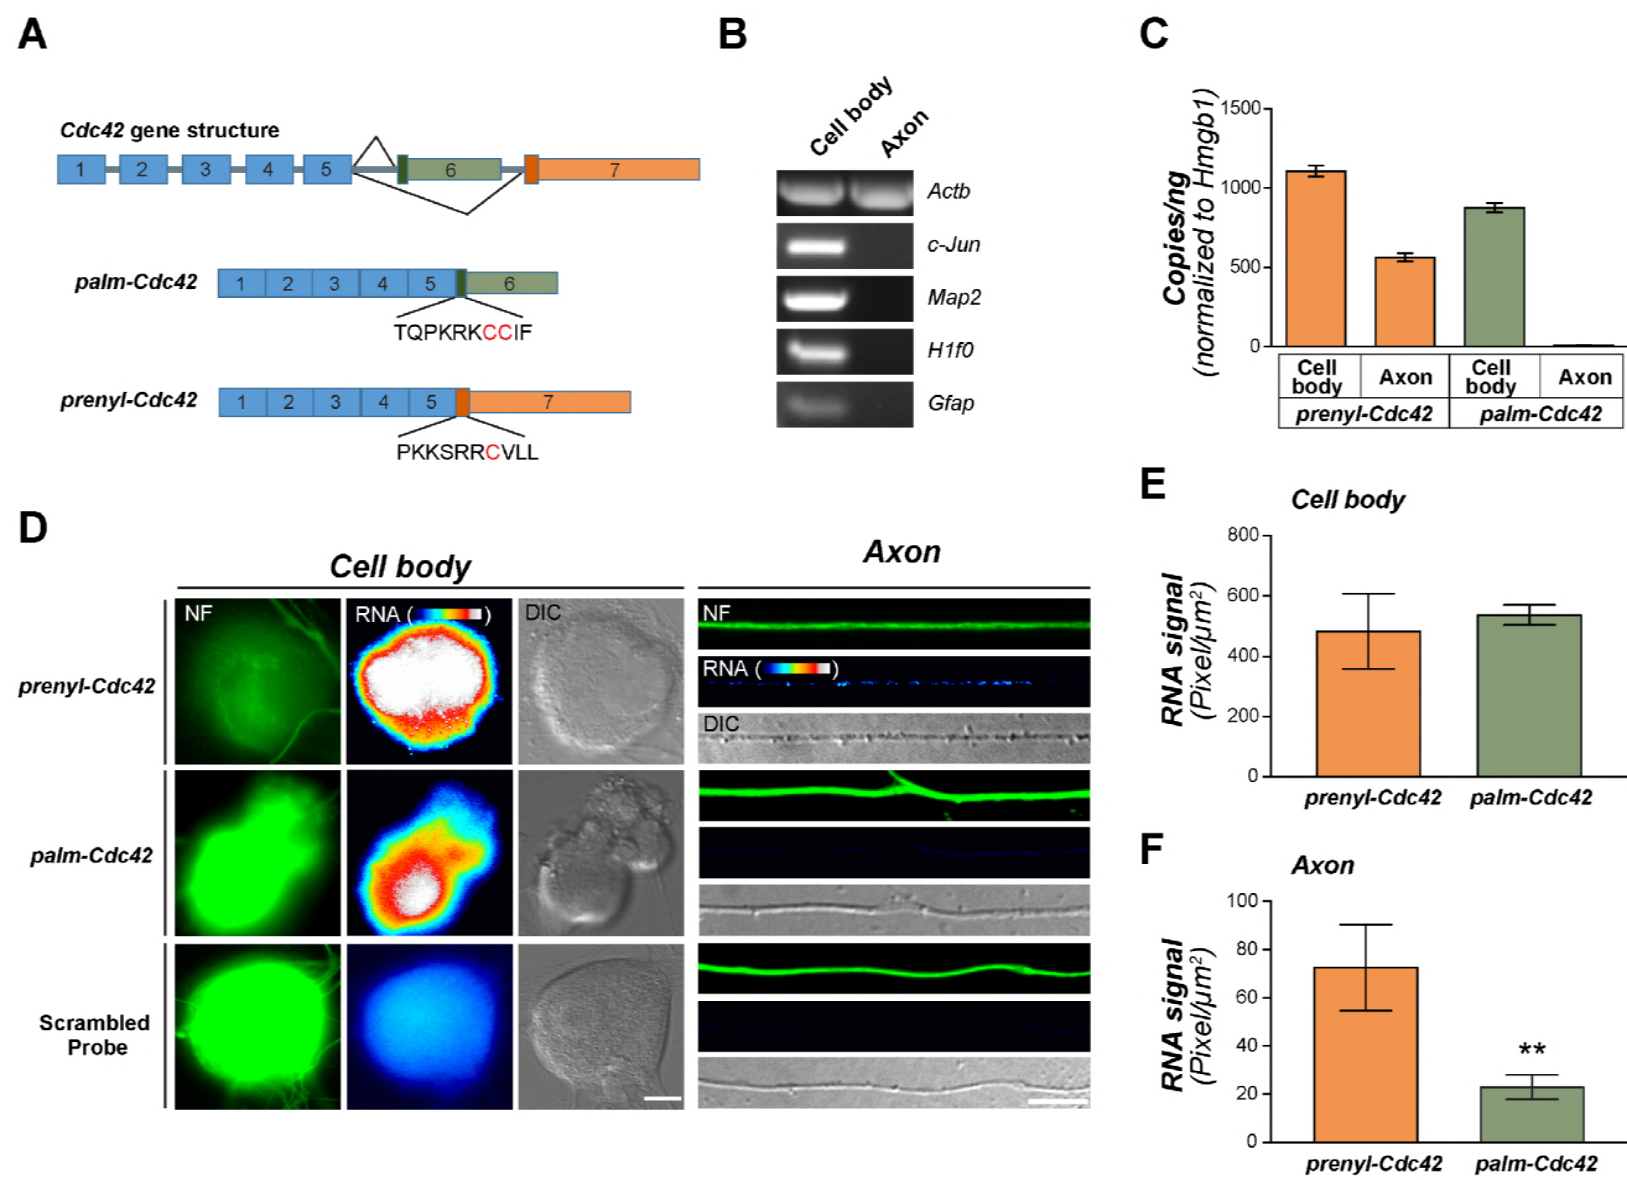

# Figure 2

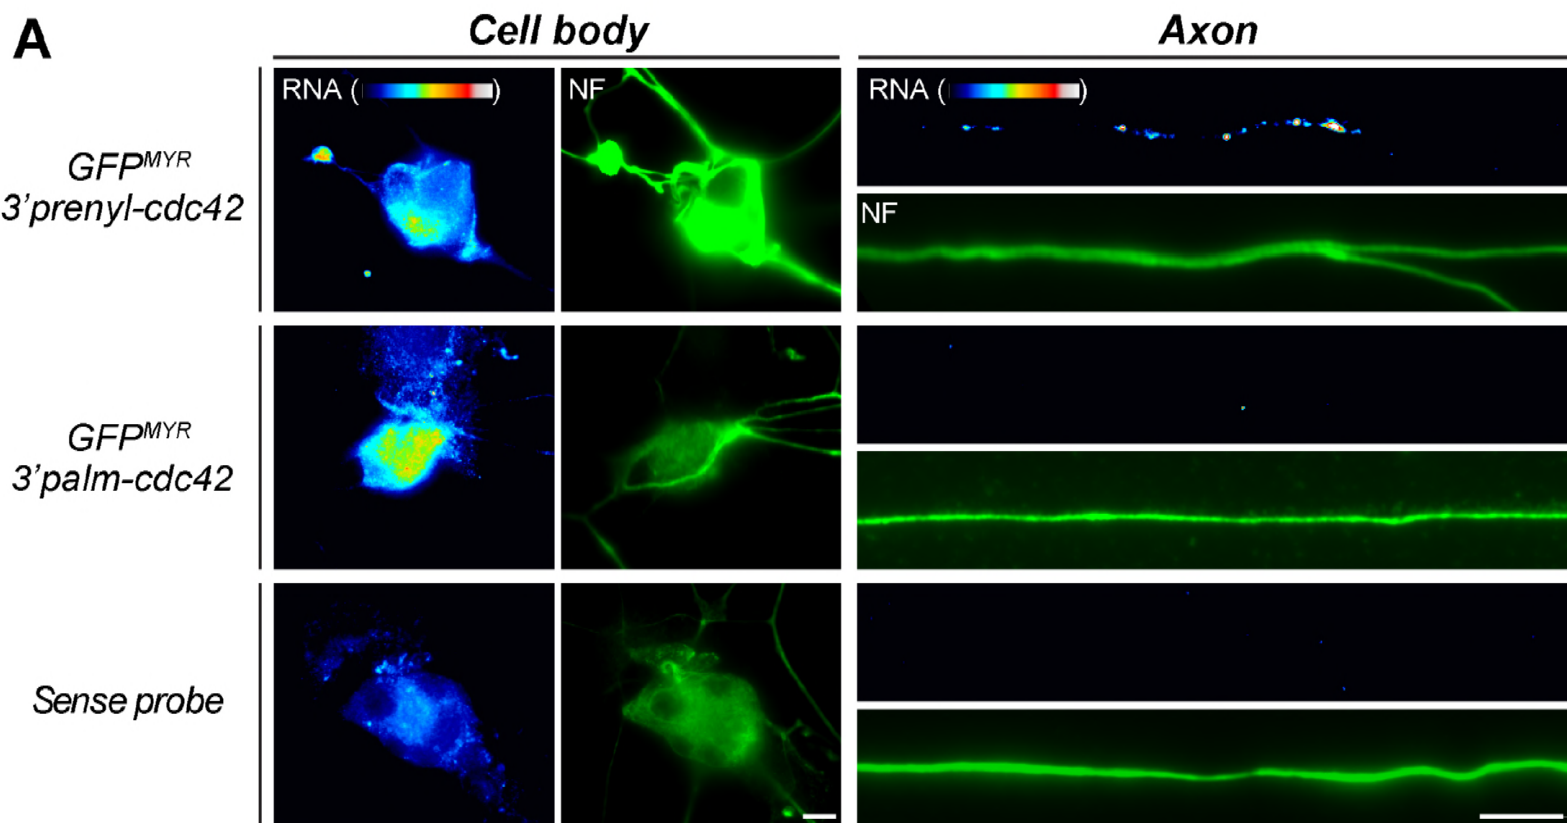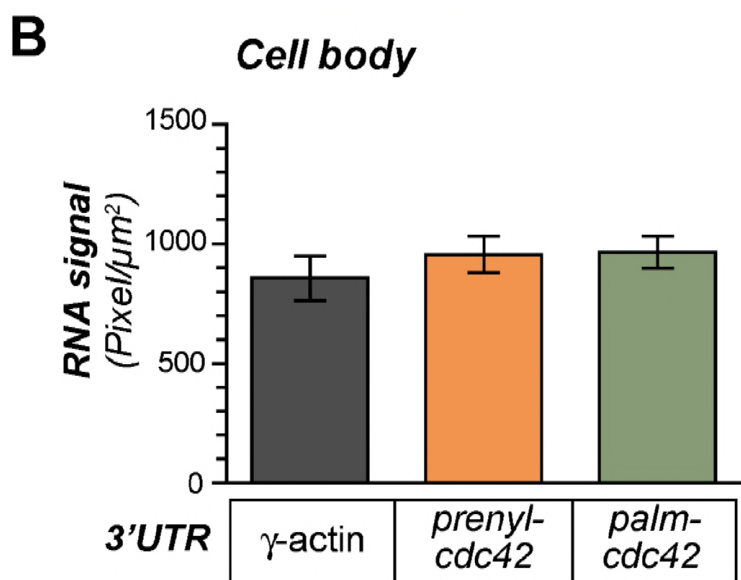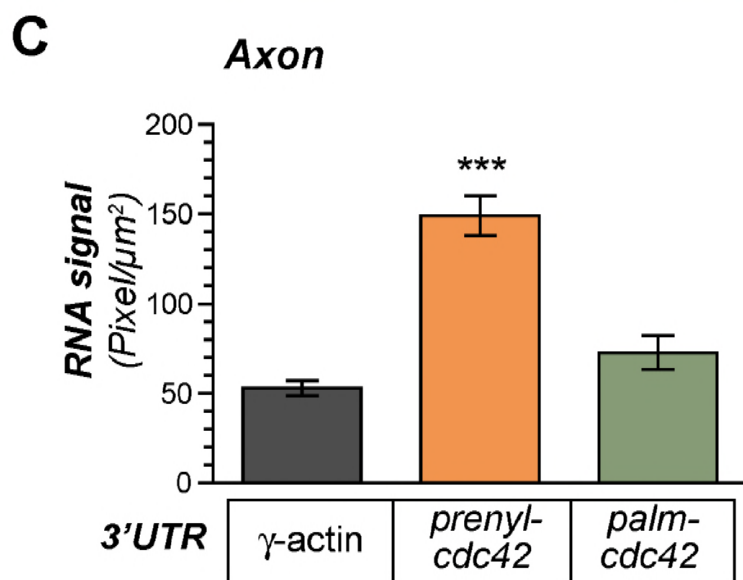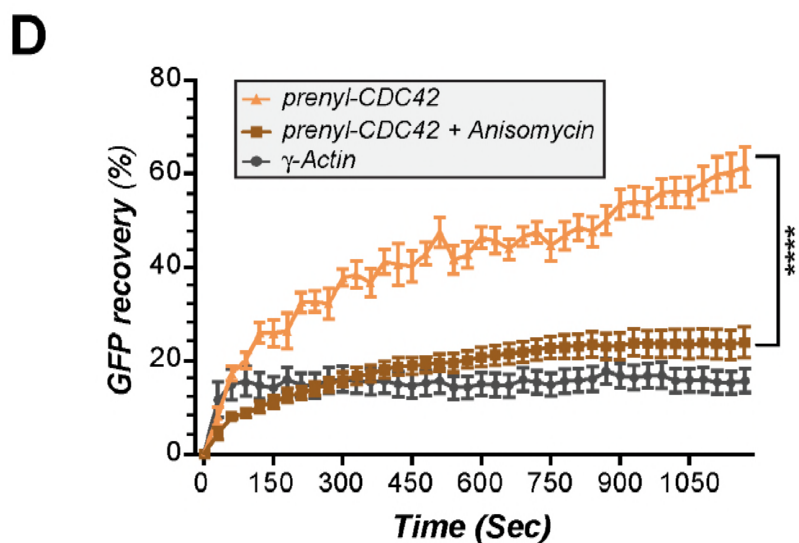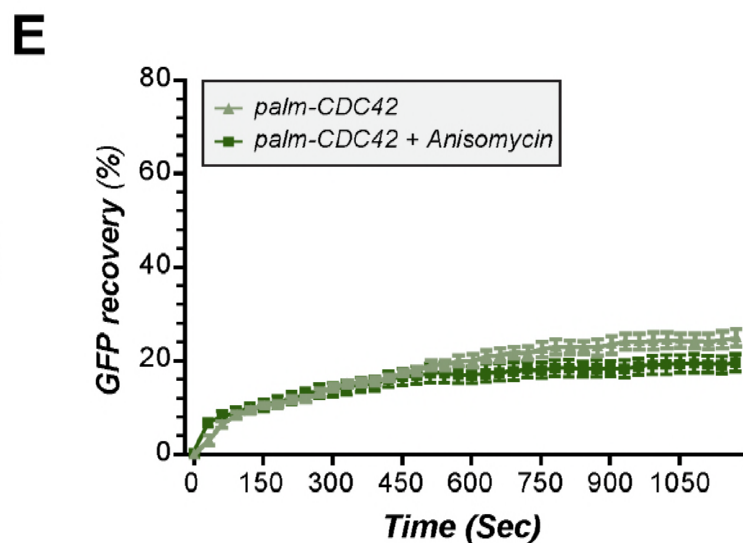

## Figure 3

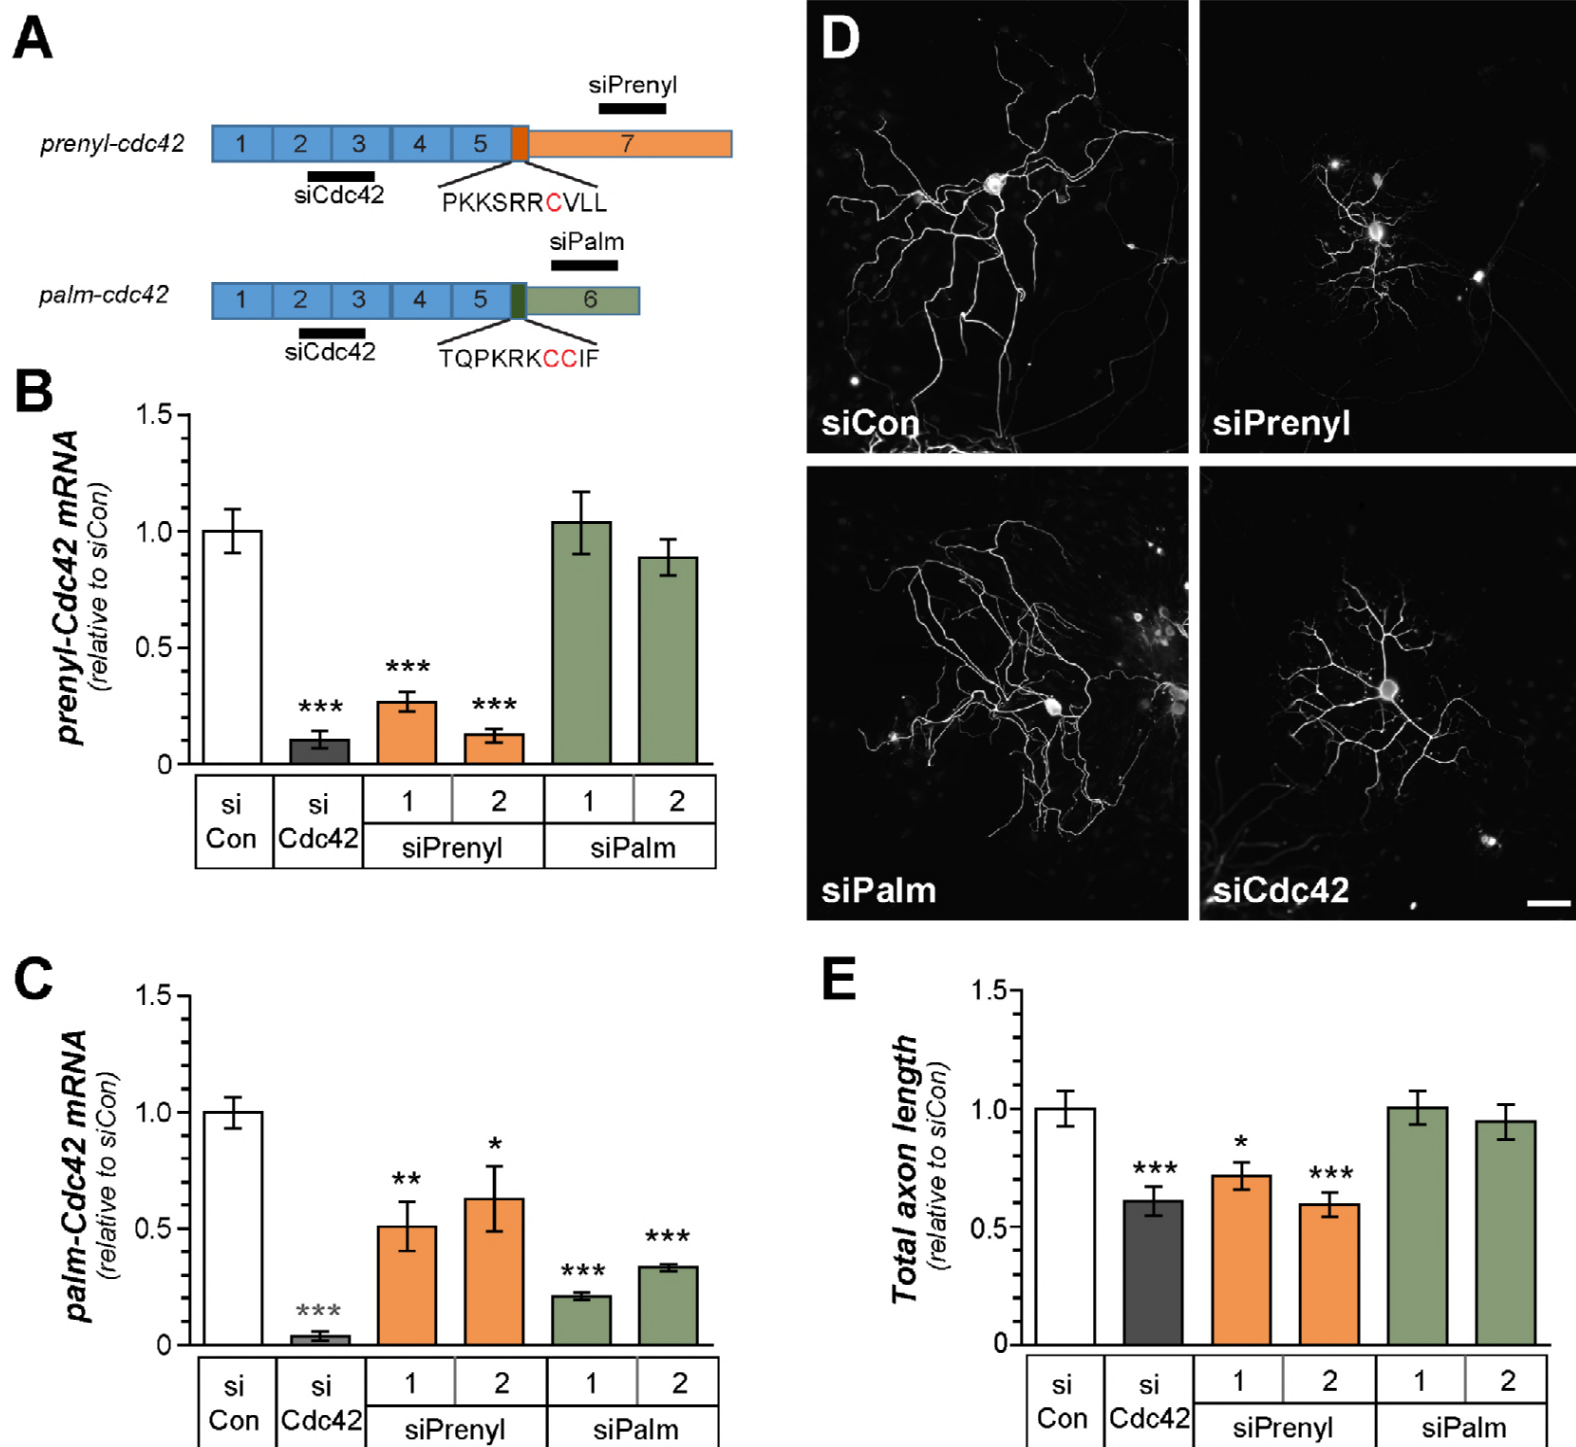

Figure 4

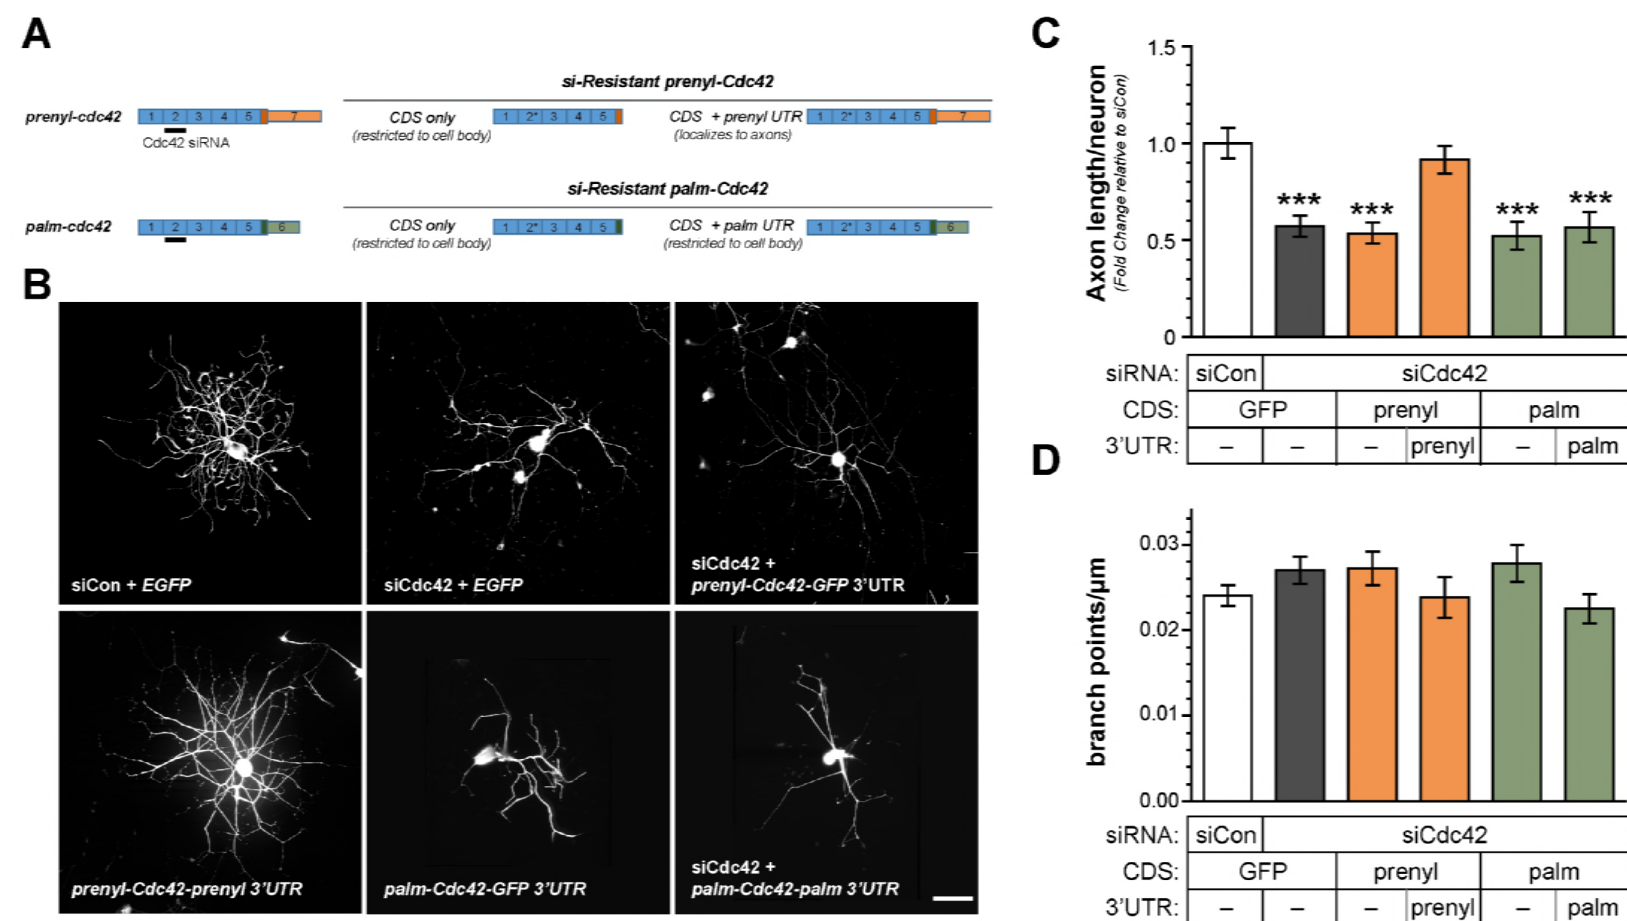

# Figure 5

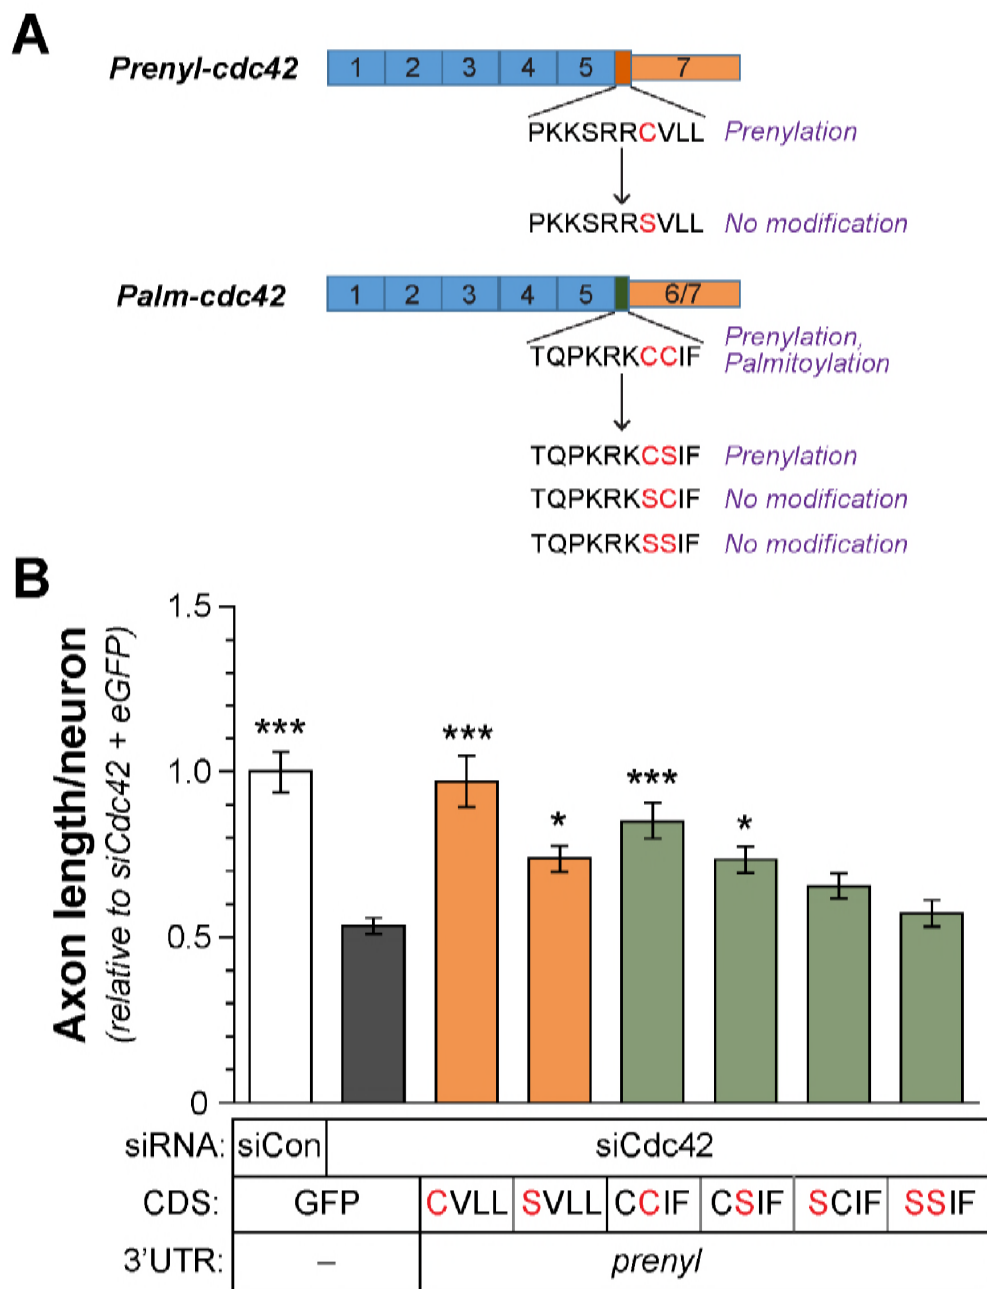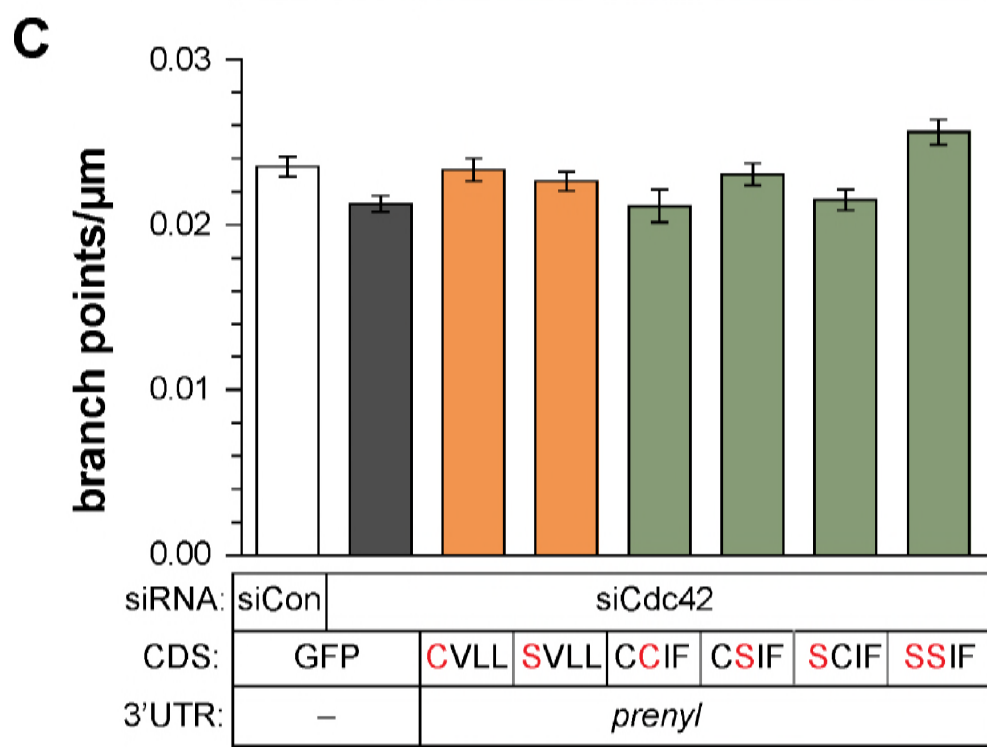

Source: https://www.biorxiv.org/content/10.1101/366369v1.full.pdf
